1 A. Santana-Sánchez<sup>1</sup>, L. Nikkanen<sup>1</sup>, G. Toth<sup>1</sup>, M. Ermakova<sup>1,†</sup>, S. Kosourov<sup>1</sup>, J. Walter<sup>1,††</sup>,  
2 M. He<sup>1,†††</sup>, E-M. Aro<sup>1</sup>, Y. Allahverdiyeva<sup>1\*</sup>

3 <sup>1</sup> Molecular Plant Biology, Department of Life Technologies, University of Turku, Turku FI-  
4 20014, Finland

5 <sup>†</sup> Present address: Research School of Biology, College of Medicine, Biology and  
6 Environment, Australian National University, Canberra ACT 2601, Australia.

7 <sup>††</sup> Present address: Department of Plant Sciences, University of Cambridge, Cambridge CB2  
8 3EA, UK

9 <sup>†††</sup> Present address: Jiangsu Provincial Key Laboratory of Marine Biology, College of  
10 Resources and Environmental Sciences, Nanjing Agricultural University, Nanjing 210095,  
11 China

12 \* Author for correspondence: [allahve@utu.fi](mailto:allahve@utu.fi)

13 **Title:** Flv3A facilitates O<sub>2</sub> photoreduction and affects H<sub>2</sub> photoproduction independently of  
14 Flv1A in diazotrophic *Anabaena* filaments

15

16 **Short title:** The role of vegetative-cell specific Flv1A and Flv3A in *Anabaena*

17 The author responsible for distribution of materials integral to the findings presented in this  
18 article in accordance with the policy described in the Instructions for Authors  
19 (<https://academic.oup.com/plcell>) is: Yagut Allahverdiyeva ([allahve@utu.fi](mailto:allahve@utu.fi)).

20

21

22

23

24

25 **Abstract**

26 The model heterocyst-forming filamentous cyanobacterium, *Anabaena* sp. PCC 7120  
27 (*Anabaena*) represents multicellular organisms capable of simultaneously performing  
28 oxygenic photosynthesis in vegetative cells and the O<sub>2</sub>-sensitive N<sub>2</sub>-fixation inside the  
29 heterocysts. The flavodiiron proteins (FDPs) have been shown to participate in  
30 photoprotection of photosynthesis by driving excess electrons to O<sub>2</sub> (Mehler-like reaction).  
31 Here, we addressed the physiological relevance of the vegetative cell-specific Flv1A and  
32 Flv3A on the bioenergetic processes occurring in diazotrophic *Anabaena* under variable CO<sub>2</sub>.  
33 We demonstrate that both Flv1A and Flv3A are required for proper induction of the Mehler-  
34 like reaction upon a sudden increase in light intensity, which is likely important for the  
35 activation of carbon-concentrating mechanisms (CCM) and CO<sub>2</sub> fixation. Under low CO<sub>2</sub>  
36 diazotrophic conditions, Flv3A is capable of mediating moderate O<sub>2</sub> photoreduction,  
37 independently of Flv1A, but in coordination with Flv2 and Flv4. Strikingly, the lack of Flv3A  
38 resulted in strong downregulation of the heterocyst-specific uptake hydrogenase, which led to  
39 enhanced H<sub>2</sub> photoproduction under both oxic and micro-oxic conditions. These results  
40 reveal a novel regulatory network between the Mehler-like reaction and the H<sub>2</sub> metabolism,  
41 which is of great interest for future photobiological production of H<sub>2</sub> in *Anabaena*.

42

43

44

45

46

47

48

49

50

51

## 52 Introduction

53 Filamentous heterocyst-forming cyanobacteria such as *Anabaena* sp. PCC 7120 (hereafter  
54 *Anabaena*) represent a unique group of prokaryotes capable of simultaneously performing  
55 two conflicting metabolic processes: (i) O<sub>2</sub>-producing photosynthesis in vegetative cells; and  
56 (ii) O<sub>2</sub>-sensitive N<sub>2</sub> fixation in heterocysts. This ability has evolved through cellular  
57 differentiation under nitrogen limiting growth conditions when some vegetative cells from  
58 the filament transform into specialized heterocyst cells that provide a microaerobic  
59 environment suitable for N<sub>2</sub> fixation. H<sub>2</sub> gas is naturally produced as an obligatory by-product  
60 of the N<sub>2</sub>-fixation process carried out by nitrogenase, which is highly sensitive to O<sub>2</sub>. The  
61 natural yield of H<sub>2</sub> gas production inside heterocysts is limited. This is due to rapid H<sub>2</sub>  
62 recycling, mainly by an uptake hydrogenase enzyme, which further returns electrons for the  
63 N<sub>2</sub>-fixing metabolism (Tsygankov et al., 2007; Bothe et al., 2010).

64 In oxygenic photosynthesis, light drives the photosynthetic linear electron transport from  
65 water to NADPH, using Photosystem (PS) II, Cytochrome (Cyt) *b<sub>6</sub>f* and PSI complexes  
66 embedded in the thylakoid membrane. These electron transport reactions are coupled to ATP  
67 synthesis *via* the generation of trans-thylakoid proton motive force (*pmf*). The obtained  
68 NADPH and ATP are then used as reducing power for CO<sub>2</sub> fixation and cell metabolism.  
69 Environmental fluctuations in light and nutrient supply might result in the over-reduction of  
70 the photosynthetic machinery. Alleviation of excess electrons by the class-C Flavodiiron  
71 proteins (hereafter FDP) has been described in all oxygenic photosynthetic organisms, apart  
72 from angiosperms, red and brown algae (Helman et al., 2003; Zhang et al., 2009; Jokel et al.,  
73 2018; Gerotto et al., 2016; Chaux et al., 2017; Ilik et al., 2017; Alboresi et al., 2019;  
74 Shimakawa et al., 2021). This group of proteins act as strong electron outlets downstream of  
75 PSI by catalyzing the photoreduction of O<sub>2</sub> into H<sub>2</sub>O (named the Mehler-like reaction)  
76 (Allahverdiyeva et al., 2013; 2015; Santana-Sánchez et al., 2019).

77 Six genes encoding FDPs have been reported in *Anabaena* (Ow et al., 2008; Zhang et al.,  
78 2009; Ermakova et al., 2013; Allahverdiyeva et al., 2015). Phylogenetic assessment has  
79 shown that four of these genes (*flv1A*, *flv3A*, *flv2*, and *flv4*) are highly similar to their  
80 homologs in *Synechocystis* sp. PCC 6803 (hereafter *Synechocystis*), SynFlv1-SynFlv4.  
81 Recently, we demonstrated that SynFlv1 and SynFlv3 proteins function in coordination with,  
82 but distinctly from SynFlv2 and SynFlv4 (Santana-Sánchez et al., 2019). While the  
83 SynFlv1/Flv3 hetero-oligomer is mainly responsible for the initial fast and transient O<sub>2</sub>

84 photoreduction during a sudden increase in light intensity, SynFlv2/Flv4 catalyzes steady O<sub>2</sub>  
85 photoreduction under illumination at air-level CO<sub>2</sub> (LC). Importantly, the single deletion of  
86 any FDP strongly diminishes the O<sub>2</sub>-photoreduction, indicating that O<sub>2</sub> photoreduction is  
87 mainly catalyzed by the hetero-oligomeric forms working in an interdependent manner  
88 (Santana-Sánchez et al., 2019; Nikkanen et al., 2020).

89 The two additional *Anabaena* FDP proteins, AnaFlv1B and AnaFlv3B, are exclusively  
90 localized in the heterocysts (Ermakova et al., 2013). The AnaFlv3B protein was shown to  
91 mediate the photoreduction of O<sub>2</sub> independently of AnaFlv1B, likely as a homo-oligomer,  
92 playing an important role in maintaining micro-oxic conditions inside heterocysts under  
93 illumination, which is crucial for N<sub>2</sub> fixation and H<sub>2</sub> production (Ermakova et al., 2014).  
94 However, research on the role of heterocyst-specific AnaFlv1B and vegetative cell-specific  
95 FDPs in diazotrophic cyanobacteria is still scarce.

96 Here, we addressed the physiological relevance of the AnaFlv1A and AnaFlv3A isoforms on  
97 the bioenergetic processes occurring in vegetative cells and heterocysts of diazotrophic  
98 *Anabaena*. AnaFlv1A and AnaFlv3A were shown to have a crucial photoprotective role  
99 under fluctuating light intensities (FL), regardless of nitrogen or CO<sub>2</sub> availability, suggesting  
100 functional analogy with homologs in *Synechocystis*. Importantly however, our results also  
101 provided evidence for distinct functional roles of AnaFlv3A and AnaFlv1A. We showed that  
102 by cooperating with AnaFlv2 and/or AnaFlv4, AnaFlv3A can function independently of  
103 AnaFlv1A in O<sub>2</sub> photoreduction in low CO<sub>2</sub> conditions. AnaFlv3A was also indirectly linked  
104 with the H<sub>2</sub> metabolism occurring inside heterocyst cells. Our work highlights the complex  
105 regulatory network between oxygenic photosynthesis, nitrogen fixation and hydrogen  
106 photoproduction.

## 107 **Results**

### 108 **Phenotypic characterization of *Anabaena* mutants deficient in Flv1A and Flv3A**

109 To investigate the function of the vegetative cell-specific Flv1A and Flv3A proteins in  
110 diazotrophic *Anabaena* filaments, we used  $\Delta flv1A$  and  $\Delta flv3A$  deletion mutants  
111 (Supplemental Figure 1 and Allahverdiyeva et al., 2013). Likewise, the SynFlv1 and  
112 SynFlv3, the AnaFlv1A (encoded by *all3891*) and AnaFlv3A (encoded by *all3895*) proteins  
113 are indispensable for diazotrophic and non-diazotrophic growth of *Anabaena* filaments under

114 severe fluctuating light intensities at both air level (low CO<sub>2</sub>, LC) and 1-3 % CO<sub>2</sub> (high CO<sub>2</sub>,  
115 HC) (Supplemental Figures 2A and Allahverdiyeva et al., 2013).

116 Under constant light (at a photon flux density of 50 μmol photons m<sup>-2</sup> s<sup>-1</sup>), there were no  
117 significant differences in the growth of these mutants compared to the WT, as measured by  
118 OD<sub>750</sub> (Supplemental Figure 2B) or concentration of chlorophyll *a* (Chl *a*). Total protein and  
119 sugar content of the WT and Δ*flv1A* and Δ*flv3A* filaments were also similar (Table 1).

120 Light microscopic images of *Anabaena* filaments indicated that both Δ*flv1A* and Δ*flv3A*  
121 mutants and WT had a similar ratio of vegetative cells to heterocysts (Table 1) and no visible  
122 changes were observed in heterocyst morphology.

123 **Table 1. Growth characteristics and photosynthetic parameters of the WT, Δ*flv1A*, and**  
124 **Δ*flv3A* filaments.** Experimental cultures were grown under diazotrophic LC conditions for 4  
125 days. The maximum quantum yield of PSII (F<sub>v</sub>/F<sub>m</sub>), minimal level of fluorescence (F<sub>o</sub>),  
126 maximal fluorescence in the dark (F<sub>m</sub><sup>D</sup>), maximal fluorescence (F<sub>m</sub><sup>'</sup>), quenching due to state  
127 transition (qT). Values are means ± SD, n = 3-5 biological replicates. Asterisks indicate  
128 statistically significant differences compared to the WT (t-test, *P* < 0.05).

| Parameters                                                                                                            | WT         | Δ <i>flv1A</i> | Δ <i>flv3A</i> |
|-----------------------------------------------------------------------------------------------------------------------|------------|----------------|----------------|
| OD <sub>750</sub>                                                                                                     | 1.46±0.18  | 1.45±0.13      | 1.43±0.18      |
| Chl <i>a</i> , μg mL <sup>-1</sup>                                                                                    | 7.01±0.80  | 6.66±0.76      | 6.97±0.96      |
| Total protein, μg mL <sup>-1</sup>                                                                                    | 263.6±31.7 | 265.3±10.1     | 254±14.1       |
| Total sugars, μg mL <sup>-1</sup>                                                                                     | 53.8±12.7  | 45.4±4.9       | 43.9±5.8       |
| Heterocyst frequency (%)                                                                                              | 12.7±1.1   | 12.1±0.9       | 10.7±2.1       |
| Nitrogenase activity (C <sub>2</sub> H <sub>2</sub> reduction),<br>μmol mg Chl <i>a</i> <sup>-1</sup> h <sup>-1</sup> | 21.3±4.0   | 16.7±4.6       | 15.9±2.7*      |
| F <sub>v</sub> /F <sub>m</sub> (with 10 μM DCMU)                                                                      | 0.45±0.05  | 0.5±0.01       | 0.49±0.01      |
| F <sub>o</sub>                                                                                                        | 0.91±0.01  | 0.86±0.00*     | 0.84±0.00*     |
| F <sub>m</sub> <sup>D</sup>                                                                                           | 1.39±0.02  | 1.25±0.02*     | 1.26±0.01*     |
| F <sub>m</sub> <sup>'</sup> (SP 1)                                                                                    | 1.46±0.05  | 1.42±0.04      | 1.49±0.04      |
| qT                                                                                                                    | 0.05±0.02  | 0.14±0.01*     | 0.18±0.01*     |

129 **Fluorescence and P700 oxidoreduction properties of Δ*flv1A* and Δ*flv3A***

130 Diazotrophic *Anabaena* WT,  $\Delta flv1A$ , and  $\Delta flv3A$  filaments, grown under LC and HC, were  
131 next subjected to fluorescence analyses under growth light intensity to disclose the impact of  
132 Flv1A and Flv3A, common or specific, on photosynthetic electron transport. The dark-  
133 adapted WT filaments showed a relatively low maximal fluorescence in the dark ( $F_m^D$ ) (state  
134 2). Upon exposure to actinic light intensity, maximal fluorescence ( $F_m'$ ) slightly increased,  
135 indicating a transition of filaments to state 1 (Figure 1A). The state 2-to-state 1 transition  
136 observed upon illumination was less pronounced in HC-grown WT filaments (Figure 1B).  
137 The effective yield of PSII [Y(II)], calculated for each saturating pulse (SP), remained stable  
138 ( $0.34 \pm 0.02$  -  $0.30 \pm 0.01$ ) during the illumination of WT filaments grown both under LC  
139 (Figure 1C) and HC (Figure 1D) conditions.

140 Both the  $\Delta flv1A$  and  $\Delta flv3A$  mutants showed significantly lower  $F_m^D$  than WT in LC (Figure  
141 1 and Table 1), implying a more pronounced state 2 in the dark. Accordingly, a stronger state  
142 2-to-state 1 transition ( $qT$  in Table 1) was observed during illumination in comparison to WT,  
143 similarly to the phenotype previously described in the *Synechocystis*  $\Delta flv3$  mutant (Elanskaya  
144 et al., 2021). Notably, during the dark-to-light transition, the fluorescence kinetics were  
145 differently affected in the two mutants grown under LC conditions. Illumination of  $\Delta flv3A$   
146 filaments resulted in a rapid increase of the fluorescence level which was gradually quenched  
147 but remained at a higher steady-state level ( $F_s$ ) compared to WT and the  $\Delta flv1A$  mutant. The  
148  $\Delta flv1A$  mutant showed only a moderate increase and then a gradual decay of fluorescence,  
149 reaching the WT  $F_s$  level after 4 min of illumination. Differently from LC grown filaments,  
150 the  $\Delta flv1A$  and  $\Delta flv3A$  mutants grown under HC conditions revealed a similar fluorescence  
151 increase during the dark-to-light transition, which gradually decayed and reached the WT  
152 levels by the end of the illumination period (Figure 1B).

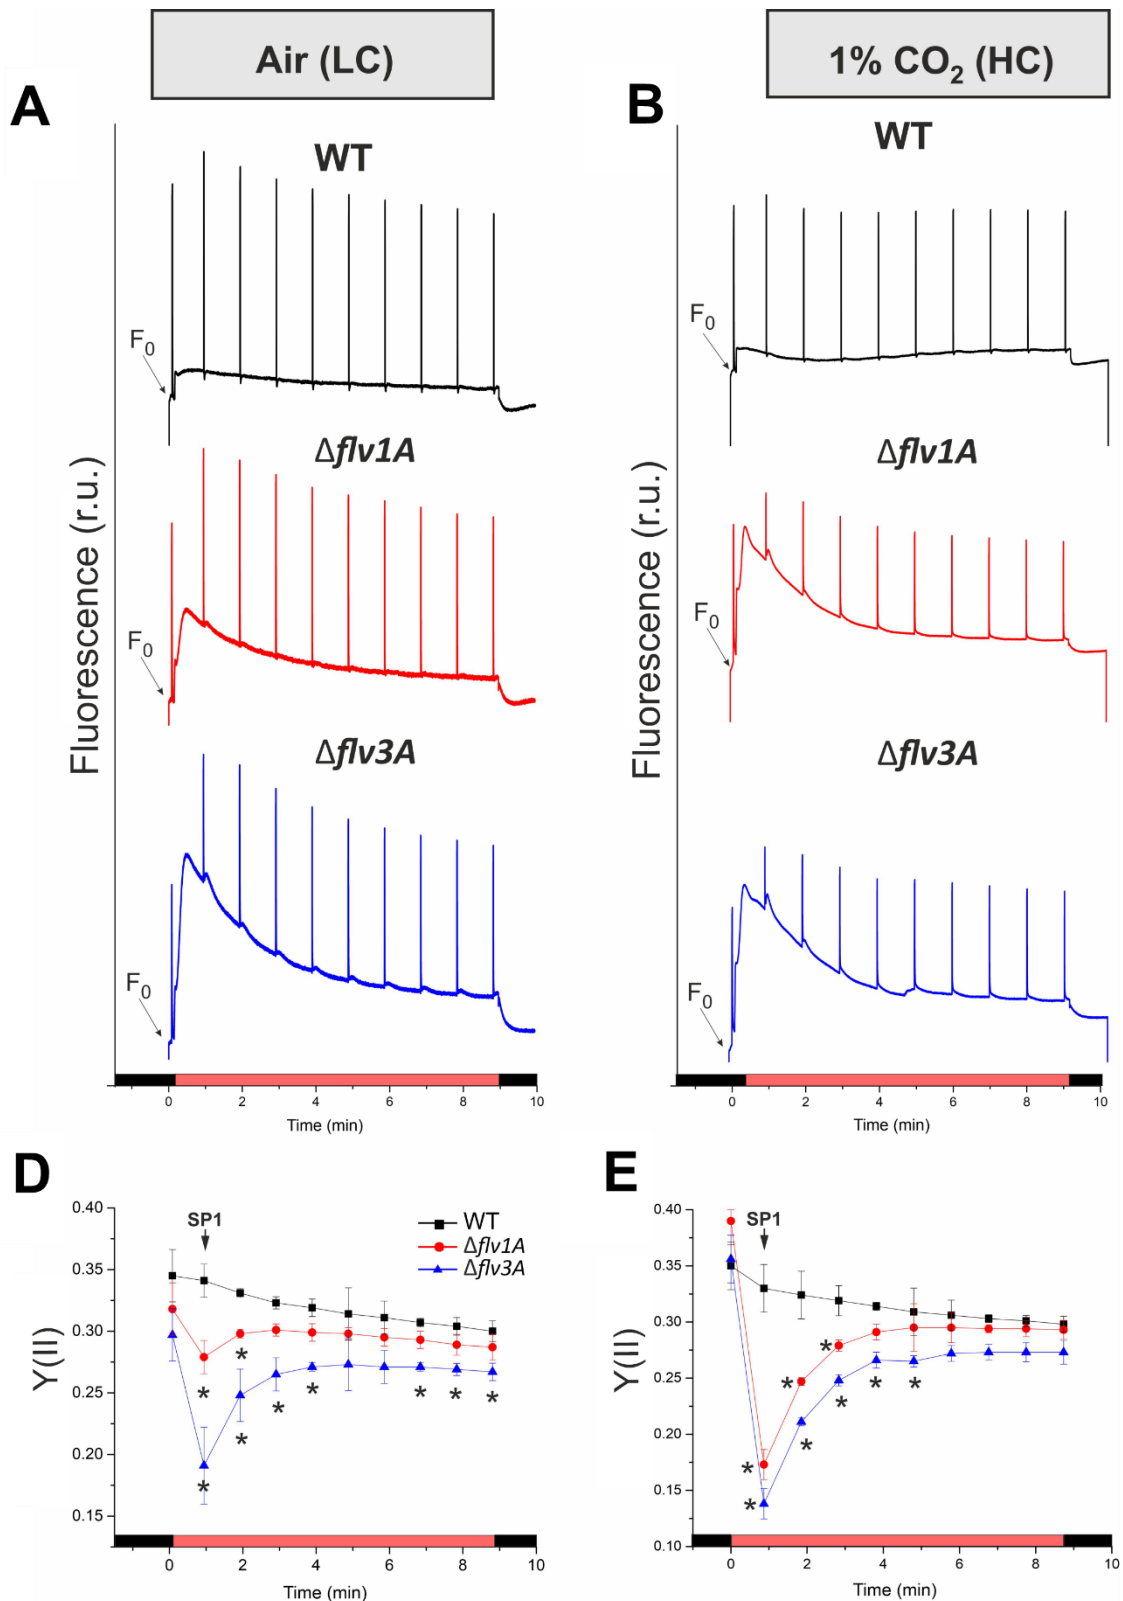

**Figure 1. Fluorescence analysis of the diazotrophic *Anabaena* WT,  $\Delta flv1A$ , and  $\Delta flv3A$ .** (A, C) Filaments were cultivated under air (LC) or (B, D) under air supplemented with 1% CO<sub>2</sub> (HC). Representative traces of 3 biological replicates are shown (A, B). Cells were dark acclimated for 10 min before illumination with 50  $\mu\text{mol photons m}^{-2} \text{s}^{-1}$  of actinic light. The effective yield of PSII [Y(II)] was calculated by applying saturating pulses during induction curve measurements (C, D). Values are means  $\pm$  SD,  $n = 3$  biological replicates. Asterisks indicate statistically significant differences compared to the WT (t-test,  $P < 0.05$ ). r.u., relative units.

154 The effective yield of PSII,  $Y(II)$  echoed high fluorescence levels and small variable  
155 fluorescence ( $F_v'$ ) upon illumination by SP1, showing a strong drop both in LC- (84% and  
156 62% that of WT in  $\Delta flv1A$  and  $\Delta flv3A$  mutants, respectively) and HC-grown filaments (53%  
157 and 39% that of WT in  $\Delta flv1A$  and  $\Delta flv3A$  mutants, respectively) (Figure 1C, D). After that,  
158 the  $Y(II)$  values gradually recovered over the course of illumination, though  $\Delta flv3A$  did not  
159 reach the WT levels (Figure 1C). Notably, the maximum quantum yield of PSII,  $F_v/F_m$ , did  
160 not differ significantly between the mutants and the WT (Table 1).

161 Examination of the transient post-illumination increase of fluorescence level ( $F_0$  rise), which  
162 reflects the NDH-1 mediated reduction of the PQ pool in darkness (Mi et al., 1995),  
163 demonstrated a notably higher  $F_0$  rise in both  $\Delta flv1A$  and  $\Delta flv3A$  mutants grown under LC  
164 and HC conditions (Supplemental Figure 3A, B). In line with the lower  $F_m^D$  (Table 1), this  
165 finding suggests elevated electron flux into the PQ pool in the  $\Delta flv1A$  and  $\Delta flv3A$  mutants,  
166 presumably mediated by NDH-1, in comparison to WT. Considering that the abundance of  
167 NdhK, the core subunit of the NDH-1 complex, was similar between all genotypes  
168 (Supplemental Figure 4D) the difference in  $F_0$  rise is likely caused by higher availability of  
169 reduced ferredoxin (Fd), the likely electron donor to both FDPs and NDH-1 (Nikkanen et al.,  
170 2021), or by post-translational regulatory factors.

171 At the onset of high irradiance both the  $\Delta flv1$  (Supplemental Figure 5) and  $\Delta flv3$  mutants of  
172 *Synechocystis* are unable to rapidly re-oxidize Fd, causing accumulation of electrons at P700  
173 (Nikkanen et al., 2020; Theune et al., 2021). To determine whether this occurs in the  
174 *Anabaena*  $\Delta flv1A$  and  $\Delta flv3A$  mutants, we determined the high light-induced fast redox  
175 changes of Fd and P700 from near-infrared absorbance differences using the Dual  
176 KLAS/NIR spectrophotometer. The results indicated that similarly to *Synechocystis*  $\Delta flv3$   
177 (Nikkanen et al., 2020) and  $\Delta flv1$  mutants (Supplemental Figure 5), both *Anabaena* mutants  
178 also suffered from delayed re-oxidation of Fd and P700 upon illumination, and showed  
179 slower post-illumination re-oxidation of Fd (Figure 2). Unlike in the *Synechocystis* mutants,  
180 there was a clear difference between the  $\Delta flv1A$  and  $\Delta flv3A$  mutants of *Anabaena*, with the  
181  $\Delta flv3A$  strain displaying more severe delay in re-oxidation of Fd and P700 than  $\Delta flv1A$ .



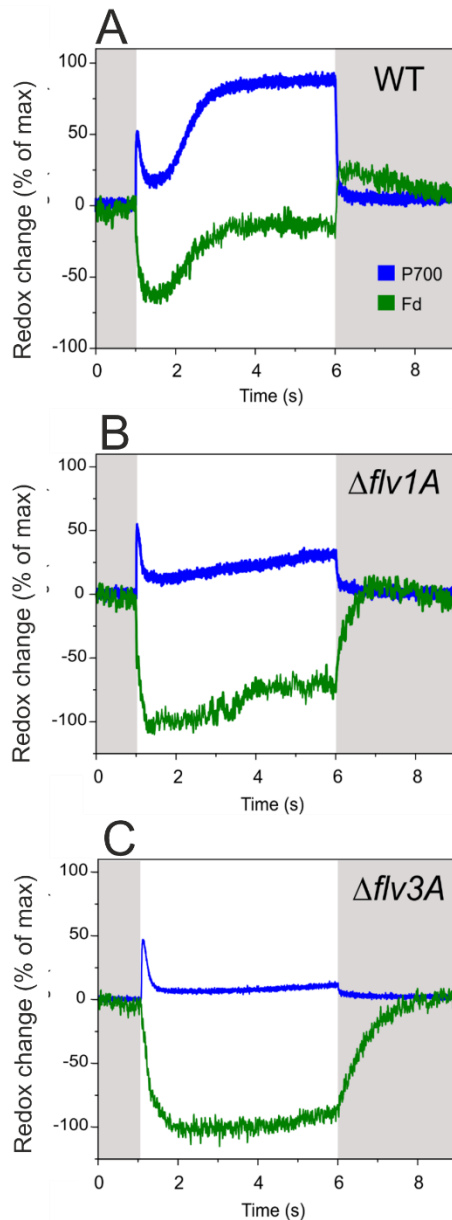

**Figure 2. Redox changes of P700 and Fd upon dark-light-dark transitions in the diazotrophic *Anabaena* WT,  $\Delta flv1A$ , and  $\Delta flv3A$  filaments.** The cells were grown under  $50 \mu\text{mol photons m}^{-2} \text{s}^{-1}$  and air-level  $\text{CO}_2$  (LC) for 4 days, harvested and adjusted to Chl *a* concentration of  $20 \mu\text{g mL}^{-1}$ . Cells were dark-adapted for 10 min, after which absorbance differences of four near-infrared wavelength pairs were measured with the Dual KLAS/NIR spectrophotometer during 5 s actinic illumination at  $503 \mu\text{mol photons m}^{-2} \text{s}^{-1}$  and subsequent darkness. P700 and Fd redox changes were then deconvoluted from the absorbance differences using specifically determined differential model plots (model spectra) for *Anabaena* (see Materials and methods). Maximal levels of Fd reduction and P700 oxidation in each sample were used to normalize the traces. Representative traces of 3 biological replicates are shown.

### 183 **Real-time gas exchanges in *Anabaena* FDP mutants**

184 To clarify the specific impacts of *flv1A* and *flv3A* deletions on real-time gas fluxes in the  
185 diazotrophic filaments of *Anabaena*, we used membrane inlet mass spectrometry (MIMS)  
186 analysis (Figure 3). The MIMS technique combined with the use of  $^{18}\text{O}_2$  isotopologue allows  
187 distinguishing between light-induced  $\text{O}_2$  reduction (uptake) and photosynthetic  $\text{O}_2$   
188 production. The net  $\text{O}_2$  evolution rate was calculated as the difference between the rates of  
189 gross  $\text{O}_2$  evolution and  $\text{O}_2$  uptake in the light. For all MIMS measurements, gas exchange  
190 was monitored for 4 min in dark followed by 5 min of high irradiance ( $500 \mu\text{mol photons m}^{-2}$   
191  $\text{s}^{-1}$ ) and for an additional 3 min in the dark.

192

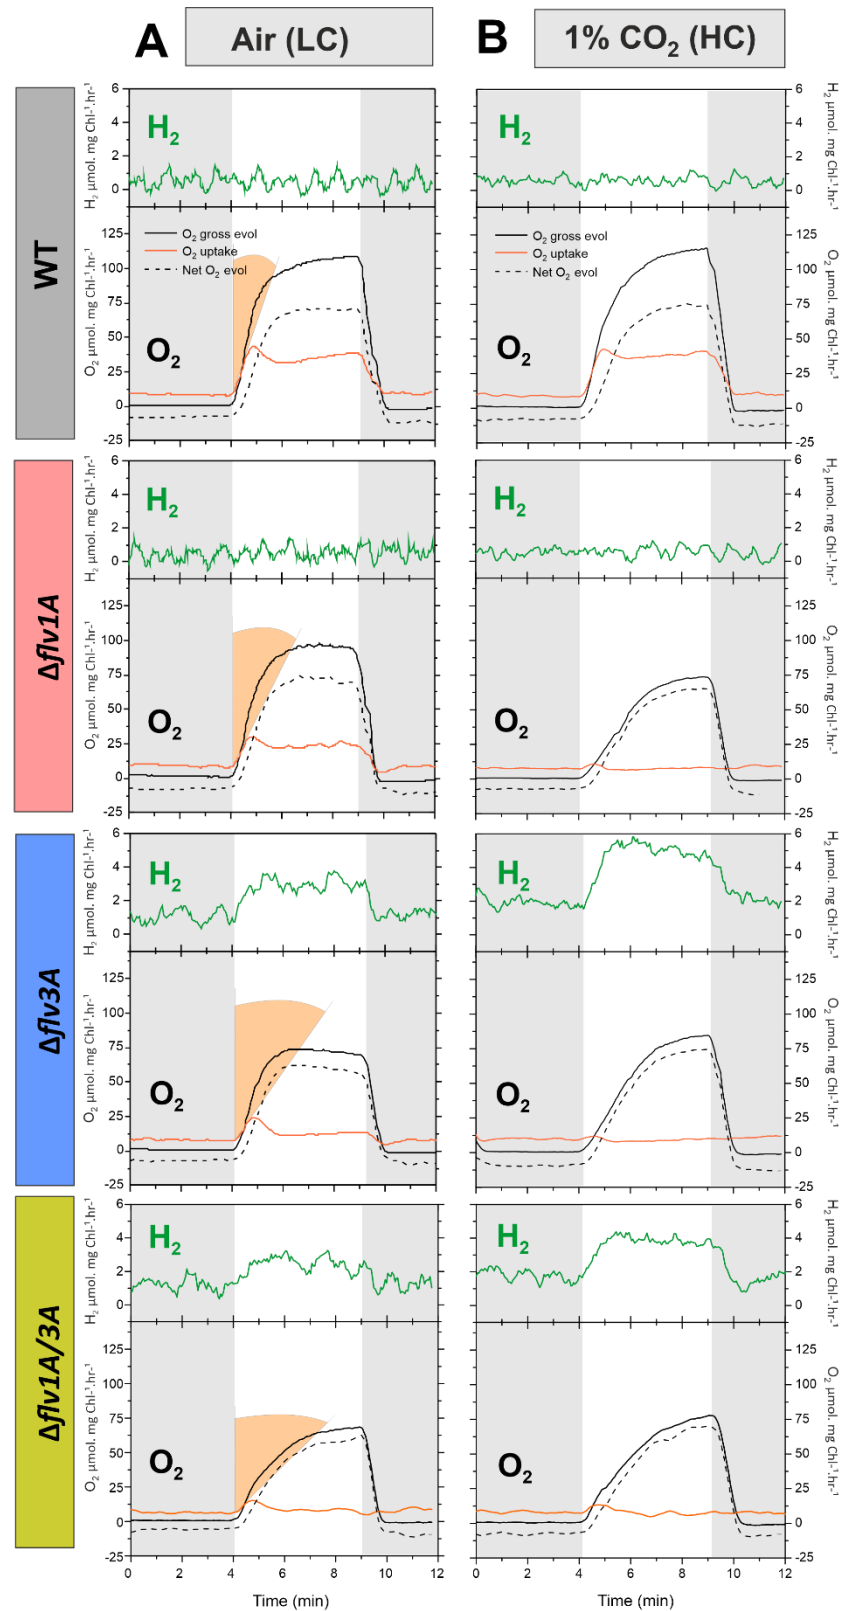

**Figure 3. O<sub>2</sub> and H<sub>2</sub> exchange rates of the diazotrophic *Anabaena* WT,  $\Delta flv1A$  and  $\Delta flv3A$  filaments.** The filaments were cultivated for 4 days under air (LC) (A) and high carbon (1% CO<sub>2</sub> in the air, HC) (B), after which the filaments were harvested and the Chl concentration adjusted to 10  $\mu\text{g mL}^{-1}$ . Gas exchange rates were calculated in darkness (grey areas of the graphs) and under illumination with actinic white light at 500  $\mu\text{mol photons m}^{-2} \text{s}^{-1}$ . For LC measurements, samples were supplemented with 1.5 mM NaHCO<sub>3</sub>. Orange shading indicates the differences in the initial slope of the O<sub>2</sub> photoreduction rates. The plots are representative of three independent biological replicates.

193 Illumination of WT filaments grown under LC demonstrated a rapid increase in the rate of O<sub>2</sub>  
194 uptake from 10.6±2.7 μmol O<sub>2</sub> mg Chl a<sup>-1</sup> h<sup>-1</sup> in darkness to 34.6±0.2 μmol O<sub>2</sub> mg Chl a<sup>-1</sup> h<sup>-1</sup>  
195 in light. This fast induction phase was followed by a decay that stabilized at 28.4±1.4 μmol  
196 O<sub>2</sub> mg Chl a<sup>-1</sup> h<sup>-1</sup> after 3 min (Figure 3A, Supplemental Table 1). This pattern resembles, to  
197 some extent, previously described triphasic kinetics of O<sub>2</sub> photoreduction in *Synechocystis*  
198 grown under LC conditions (Santana-Sánchez et al., 2019), and in HC-grown  
199 *Chlamydomonas reinhardtii* cells illuminated with high light intensity (Saroussi et al., 2019).  
200 Both mutants showed slightly lower O<sub>2</sub> uptake rates in darkness than the WT (Supplemental  
201 Table 1) but the rate of O<sub>2</sub> consumption under illumination was affected to different extents  
202 in Δ*flv1A* and Δ*flv3A* filaments. The Δ*flv3A* mutant exhibited strong impairment of light-  
203 induced O<sub>2</sub> uptake, showing a maximal rate of 15.6±0.1 μmol O<sub>2</sub> mg Chl a<sup>-1</sup> h<sup>-1</sup> (52 % lower  
204 than the WT) at the onset of light, which declined to a residual rate of 4.3±0.2 μmol O<sub>2</sub> mg  
205 Chl a<sup>-1</sup> h<sup>-1</sup> by the end of illumination. In contrast to the *Synechocystis* Δ*flv1* mutant  
206 (Supplemental Figure 7) where O<sub>2</sub> reduction is almost fully eliminated, the *Anabaena* Δ*flv1A*  
207 filaments showed an intermediate phenotype whereby a maximum light-induced O<sub>2</sub> reduction  
208 rate of 22.2±2.8 μmol O<sub>2</sub> mg Chl a<sup>-1</sup> h<sup>-1</sup> (34% lower than WT) was observed, which declined  
209 to 15.5±1.2 μmol O<sub>2</sub> mg Chl a<sup>-1</sup> h<sup>-1</sup> (Figure 3A). Moreover, both Δ*flv1A* and Δ*flv3A* mutants  
210 showed slower activation of O<sub>2</sub> photoreduction, with a more pronounced lag-phase in Δ*flv3A*  
211 (Figure 3A, orange shading). These results suggested that both AnaFlv1A and AnaFlv3A  
212 contribute to the Mehler-like reaction, but to a differing extent and presumably in different  
213 homo/hetero-oligomeric arrangements.

214 To clarify whether the homo-oligomers of AnaFlv1A in Δ*flv3A* and conversely, the homo-  
215 oligomers of AnaFlv3A in Δ*flv1A* mutants contribute to the observed O<sub>2</sub> photoreduction rates  
216 (Figure 3A), we constructed a double mutant Δ*flv1A*/Δ*flv3A* (Supplemental Figure 6). MIMS  
217 analysis revealed that concomitant inactivation of both *flv1A* and *flv3A* strongly inhibited the  
218 O<sub>2</sub> photoreduction in *Anabaena* filaments cultivated under LC conditions (Figure 3A)  
219 suggesting either contribution of AnaFlv1 and AnaFlv3 homo-oligomers to O<sub>2</sub>  
220 photoreduction in the single mutants or involvement of AnaFlv2 and/or AnaFlv4 proteins in  
221 this process. Previous studies with *Synechocystis* cells (Zhang et al., 2009; Wang et al., 2004;  
222 Eisenhut et al., 2012; Santana-Sánchez et al., 2019) and non-diazotrophic *Anabaena* WT  
223 filaments (Ermakova et al., 2013) demonstrated high transcript abundance of *flv2* and *flv4* at  
224 LC. Therefore, we next investigated the abundance of *flv2* and *flv4* transcripts in diazotrophic  
225 *Anabaena* filaments grown under LC and HC using RT-qPCR. The Δ*flv1A* and Δ*flv3A*

226 mutants grown under LC demonstrated significantly higher *flv2* and *flv4* transcript levels  
227 compared to the WT (Supplemental Figure 4A). Under HC, transcript abundances of *flv2* and  
228 *flv4* did not differ between the mutants and the WT but were drastically lower in all  
229 genotypes compared to LC conditions (Supplemental Figure 4B). This prompted us to  
230 examine the possible contribution of AnaFlv2 and AnaFlv4 proteins to the Mehler-like  
231 reaction by comparing the O<sub>2</sub> photoreduction rates in  $\Delta flv1A$  and  $\Delta flv3A$  mutants grown  
232 under LC (Figure 3A) vs HC conditions (Figure 3B), where the expression of *flv2* and *flv4*  
233 were found to be induced and repressed, respectively.

234 While the O<sub>2</sub> photoreduction in WT filaments grown under HC was comparable to that under  
235 LC conditions (Figure 3A), the inactivation of *flv1A* and/or *flv3A* fully eliminated light-  
236 induced O<sub>2</sub> reduction in the filaments grown under HC (Figure 3B). This result suggests that  
237 the highly expressed *flv2* and *flv4* likely contribute to O<sub>2</sub> photoreduction in diazotrophic  
238  $\Delta flv1A$  and  $\Delta flv3A$  filaments grown under LC conditions. Nevertheless, further elucidation is  
239 needed to verify the functioning of the AnaFlv2/Flv4 hetero-oligomer or different FDP  
240 oligomer compositions in O<sub>2</sub> photoreduction.

241 It is important to note that under LC conditions, while gross O<sub>2</sub> evolution and net  
242 photosynthetic O<sub>2</sub> production rates of the  $\Delta flv1A$  mutant were comparable to those of the WT,  
243 the  $\Delta flv3A$  mutant demonstrated lower gross and net O<sub>2</sub> evolution rates (Figure 3A,  
244 Supplemental Table 1). Strikingly, the initial peak in CO<sub>2</sub> uptake rates associated with the  
245 CCM activation (Liran et al., 2018) as well as the steady-state of CO<sub>2</sub> fixation of both  
246 deletion mutants were significantly diminished compared to the WT, and the  $\Delta flv3A$  strain  
247 showed pronounced impairment than  $\Delta flv1A$  (Supplemental Table 1, Supplemental Figure  
248 8B). Under HC conditions, both mutants had lower gross O<sub>2</sub> evolution ( $65.9 \pm 7.3$  and  
249  $76.8 \pm 6.5$   $\mu\text{mol O}_2 \text{ mg Chl } a^{-1} \text{ h}^{-1}$ , respectively) relative to the WT ( $122.2 \pm 14.8$   $\mu\text{mol O}_2 \text{ mg}$   
250  $\text{Chl } a^{-1} \text{ h}^{-1}$ ) and a delay in the induction of O<sub>2</sub> evolution upon illumination (Figure 3B).  
251 Accordingly, the activation of CO<sub>2</sub> fixation under HC conditions was slower and decreased in  
252 both mutants compared to WT (Supplemental Figure 8C). In the  $\Delta flv1A/\Delta flv3A$  double  
253 mutant a delay in gross O<sub>2</sub> evolution was observed under LC that was more severe than in  
254  $\Delta flv3A$  cells (Figure 3A), while under HC all three mutant strains were similarly impaired  
255 (Figure 3B). This suggests that not only AnaFlv3A, but also AnaFlv1A may be performing  
256 some AnaFlv2-4-dependent but AnaFlv3A-independent function in LC that affects  
257 photosynthetic electron transport.

## 258 Consequences of *flv1A* or *flv3A* deletion on diazotrophic metabolism

259 Based on the results above it is clear that AnaFlv1A and AnaFlv3A impact the photosynthetic  
260 apparatus to different extents in LC-grown diazotrophic *Anabaena*. In comparison to the  
261 inactivation of AnaFlv1A, the deletion of AnaFlv3A resulted in a stronger reduction of the  
262 PQ pool, leading to a consistent decrease of PSII effective yield (Figure 1C) and, eventually,  
263 lower net O<sub>2</sub> evolution rates over the illumination period (Figure 3A). On the other hand,  
264 previous studies with different diazotrophic *Anabaena* species have demonstrated that the  
265 disruption of PSII activity in vegetative cells has implications for N<sub>2</sub> and H<sub>2</sub> metabolism  
266 inside heterocysts, thus, modulating the diazotrophic metabolism of filaments (Khetkorn et  
267 al., 2012; Chen et al., 2014). We, therefore, examined whether the absence of AnaFlv1A or  
268 AnaFlv3A from vegetative cells has a long-distance impact on the heterocyst metabolism. To  
269 this end, we analyzed the nitrogenase activity and H<sub>2</sub> fluxes of diazotrophic *Anabaena* WT,  
270  $\Delta flv1A$  and  $\Delta flv3A$  mutants.

271 As demonstrated in Table 1, both  $\Delta flv1A$  and  $\Delta flv3A$  mutants showed somewhat lower  
272 nitrogenase activity in comparison to WT filaments, yet only the nitrogenase activity of the  
273  $\Delta flv3A$  mutant was significantly lower compared to WT. Real-time gas exchange monitored  
274 by MIMS (Figure 3) revealed no changes in the H<sub>2</sub> gas concentration in WT and  $\Delta flv1A$   
275 during the dark-light transition. In contrast, the  $\Delta flv3A$  mutant showed an increase in H<sub>2</sub> level  
276 in the dark and a clear light-induced H<sub>2</sub> gas production ( $1.7 \pm 0.4 \mu\text{mol mg Chl } a^{-1} \text{ h}^{-1}$ ) (Figure  
277 3A). This result was confirmed by a second independent  $\Delta flv3A$  mutant strain showing  
278 similar light-induced H<sub>2</sub> production ( $\Delta flv3A\_C2$  in Supplemental Figure 8A). Interestingly,  
279 the  $\Delta flv3A$  mutant cultivated under HC conditions demonstrated an even higher H<sub>2</sub>  
280 photoproduction rate ( $2.8 \pm 0.8 \mu\text{mol mg Chl } a^{-1} \text{ h}^{-1}$ , Figure 3B). Although  $\Delta flv3A$  filaments  
281 showed real-time H<sub>2</sub> production under oxic conditions, the rate of H<sub>2</sub> production remained  
282 low.

283 Next, we monitored H<sub>2</sub> in anoxic cultures using a Clark-type electrode. Under the N<sub>2</sub>  
284 atmosphere, the  $\Delta flv3A$  mutant demonstrated a significantly higher yield of H<sub>2</sub>  
285 photoproduction accompanied by a three times higher specific H<sub>2</sub> production rate compared  
286 to the WT (Figure 4A, Supplemental Figure 9A). To confirm that the observed H<sub>2</sub> production  
287 is nitrogenase-mediated, we monitored the reaction under an argon (Ar) atmosphere as it is  
288 known that in the absence of N<sub>2</sub> substrate, nitrogenase reduces protons to H<sub>2</sub> (Hoffman et al.,  
289 2014). Indeed, the specific H<sub>2</sub> photoproduction rate of the WT filaments under an Ar was

290 about 7-fold higher compared to the N<sub>2</sub> atmosphere (Supplemental Figure 9A). In the case of  
291  $\Delta flv3A$ , the yield of H<sub>2</sub> photoproduction was strongly enhanced under an Ar and the  
292 production rate increased by around 10 times compared to N<sub>2</sub> (Supplemental Figure 9A). In  
293 addition, a drastically decreased transcript abundance of *hoxH* in both  $\Delta flv1A$  and  $\Delta flv3A$   
294 mutants compared to the WT (Supplemental Figure 9B), implied a negligible contribution of  
295 Hox to H<sub>2</sub> production in  $\Delta flv3A$  mutant. Collectively, these results provide evidence that the  
296 enhanced H<sub>2</sub> production in the  $\Delta flv3A$  mutant is mediated by nitrogenase.

297 However, the observed decrease in nitrogenase activity (Table 1) did not correlate with an  
298 increase in H<sub>2</sub> photoproduction in  $\Delta flv3A$  (Figure 3A). It is well known that the net  
299 nitrogenase-mediated production of H<sub>2</sub> in heterocysts is strongly affected by the activity of  
300 uptake hydrogenase (Hup), which oxidizes H<sub>2</sub> (Tamagnini et al., 2007). Therefore, it is  
301 conceivable that the impairment of the Hup function would account for the increased  
302 production of H<sub>2</sub> in  $\Delta flv3A$ . To examine the H<sub>2</sub> fluxes, we traced the uptake of Deuterium  
303 (<sup>2</sup>H<sub>2</sub>, D<sub>2</sub>) by the WT,  $\Delta flv1A$ , and  $\Delta flv3A$ . Whilst WT and  $\Delta flv1A$  filaments efficiently  
304 consumed D<sub>2</sub>,  $\Delta flv3A$  showed a significantly lower capacity for D<sub>2</sub> uptake (Figure 4B). These  
305 observations confirmed that the impaired capacity of the  $\Delta flv3A$  mutant to recycle H<sub>2</sub> could  
306 be the reason for the increased accumulation of H<sub>2</sub> observed in  $\Delta flv3A$  mutant.

307 To better understand the molecular mechanism behind the defective H<sub>2</sub> uptake of  $\Delta flv3A$ , we  
308 analyzed the transcript and protein abundances of the large subunit of Hup (HupL). We found  
309 significant downregulation of the mature form of *hupL* transcript in both  $\Delta flv1A$  and  $\Delta flv3A$   
310 mutants, in comparison to the WT (Figure 4C). Importantly, *hupL* transcript level in  $\Delta flv3A$   
311 was significantly lower than in the  $\Delta flv1A$  mutant. Immunoblotting with specific antibody  
312 further revealed the lack of detectable HupL protein in  $\Delta flv3A$ , a result comparable to the  
313 *hupL*-disrupted mutant ( $\Delta hupL$ ), while the  $\Delta flv1A$  mutant showed only a lowered level of  
314 HupL relative to the WT (Figure 4D). Taken together, these results demonstrate that the lack  
315 of HupL protein in heterocyst cells of  $\Delta flv3A$  is the reason behind the enhanced nitrogenase  
316 based H<sub>2</sub> photoproduction observed for this mutant.

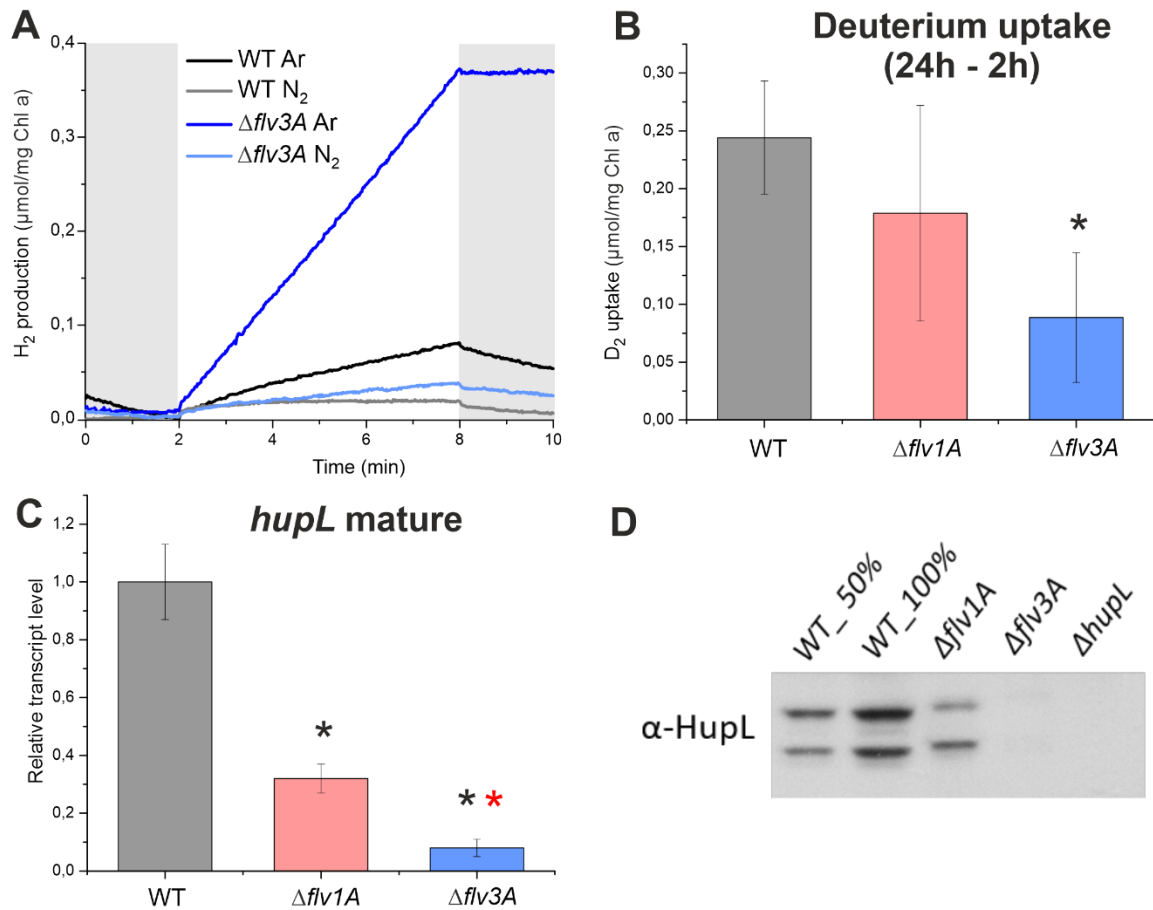

**Figure 4. H<sub>2</sub> metabolism of diazotrophic filaments of *Anabaena* WT,  $\Delta flv1A$ , and  $\Delta flv3A$ .** (A) H<sub>2</sub> production yield was monitored by a H<sub>2</sub> electrode under an Ar or N<sub>2</sub> atmosphere in the dark (grey areas) and under 800  $\mu\text{mol photons m}^{-2} \text{s}^{-1}$  light. (B) Deuterium uptake by the filaments was calculated from the difference in D<sub>2</sub> concentration between 2 h and 24 h after the injection in the vials initially flushed with Ar. (C) Relative transcript level of the mature *hupL*. (D) Immunodetection of HupL with a specific antibody. (E) Nitrogenase activity was measured using the acetylene reduction assay. Values are Mean  $\pm$  SD, n = 3 biological replicates. Black asterisk indicates statistically significant differences compared to the WT (t-test,  $P < 0.05$ ). Red asterisk indicates statistically significant differences compared to the  $\Delta flv1A$  mutant (t-test,  $P < 0.05$ ).

317

## 318 Discussion

319 The heterocyst-forming cyanobacteria are considered one of the earliest forms of  
 320 multicellular filaments in the history of life (Schirrneister et al., 2016). Despite the extensive  
 321 characterization of heterocyst differentiation, little is known about the co-regulation and  
 322 interdependence of the two contrasting processes of N<sub>2</sub> fixation and oxygenic photosynthesis  
 323 occurring in heterocysts and vegetative cells, respectively. Under challenging environmental  
 324 conditions, diazotrophic cyanobacteria must find an optimal balance between photochemical  
 325 reactions and downstream processes that consume electrons in both cell types. In this work,  
 326 we employed  $\Delta flv1A$  and  $\Delta flv3A$  mutants of *Anabaena* to examine the physiological



327 significance of the vegetative cell-specific AnaFlv1A and AnaFlv3A proteins on the  
328 bioenergetic processes of diazotrophic cyanobacteria. Our results provide evidence that, in  
329 contrast to the *Synechocystis* homolog, AnaFlv3A can mediate moderate O<sub>2</sub> photoreduction  
330 independently of AnaFlv1A and in coordination with AnaFlv2 and AnaFlv4 under LC  
331 conditions. Moreover, the vegetative-cell specific AnaFlv3A protein exhibits important link  
332 to the H<sub>2</sub> metabolism inside the heterocyst, since the inactivation of this protein results in  
333 high H<sub>2</sub> photoproduction even under ambient air. Nevertheless, we have demonstrated that  
334 both AnaFlv1A and AnaFlv3A proteins, presumably as hetero-oligomers, are required for  
335 efficient induction of the Mehler-like reaction during dark-to-light transitions, are crucial for  
336 photoprotection when light intensity rapidly fluctuates, and are likely needed for the  
337 activation of CO<sub>2</sub> assimilation.

### 338 **In the absence of AnaFlv1A, AnaFlv3A can team up with AnaFlv2 and/or AnaFlv4 to** 339 **mediate O<sub>2</sub> photoreduction under LC conditions**

340 In line with previous transcriptional analysis showing a decrease in the expression of both  
341 *flv1A* and *flv3A* in *Anabaena* WT upon the shift to diazotrophic conditions (Ermakova et al.  
342 2014), the single deletions of AnaFlv1A or AnaFlv3A did not affect the diazotrophic growth  
343 of mutants under continuous illumination compared to the WT (Table 1). However, both  
344 AnaFlv1A and AnaFlv3A proteins are indispensable during sudden changes in light intensity,  
345 similar to their homologous proteins in other species (Supplemental Figure 1A,  
346 Allahverdiyeva et al., 2013; Gerotto et al., 2016; Jokel et al., 2018). Here, we have  
347 demonstrated that when both AnaFlv1A and AnaFlv3A proteins are expressed in WT  
348 filaments, the rate of the Mehler-like reaction is rapidly increased during the dark-to-light  
349 transition likely due to the activity of the AnaFlv1A/Flv3A hetero-oligomer (Figure 3).  
350 Accordingly, the absence of either AnaFlv1A or AnaFlv3A delays rise in O<sub>2</sub> photoreduction  
351 (Figure 3A) resulting in over-reduction of the PQ pool upon illumination (Figure 1A),  
352 causing a decrease in PSII yield (Figure 1C) and impairment of PSI and Fd oxidation (Figure  
353 2). This phenotype is aggravated in the mutant lacking AnaFlv3A, which showed a stronger  
354 state 2-to-state 1 transition and more severe inability to oxidize PSI than the mutant lacking  
355 AnaFlv1A (Figure 1 and Figure 2). Differently from the *Synechocystis*  $\Delta flv1$  mutant  
356 (Supplemental Figure 7), AnaFlv3A can promote O<sub>2</sub> photoreduction in the *Anabaena*  $\Delta flv1A$   
357 mutant (Figure 3A), resulting in only about 45% inhibition of steady-state O<sub>2</sub> photoreduction  
358 and 35% decrease in Y(II) in *Anabaena* under LC growth conditions (Supplemental Table 1).

359 The near elimination of the steady-state O<sub>2</sub> photoreduction in the  $\Delta flv1A/flv3A$  double mutant  
360 under LC and the single mutants under HC conditions (where AnaFlv2 and AnaFlv4 are  
361 strongly downregulated) supports (i) functional AnaFlv3A/Flv2-4 oligomerization, and/or (ii)  
362 cooperation between the AnaFlv3A/Flv3A homo-oligomer and AnaFlv2/Flv4 hetero-  
363 oligomers. Accordingly, the strong impairment of O<sub>2</sub> photoreduction in  $\Delta flv3A$  might be due  
364 to the inability of AnaFlv1A to function as a homo-oligomer and/or cooperate with  
365 AnaFlv2/Flv4. It is worth emphasizing that both  $\Delta flv1A$  and  $\Delta flv3A$  mutants showed similarly  
366 enhanced accumulation of *flv2* and *flv4* transcripts (Supplemental Figure 4A). While the  
367  $\Delta flv1A$  mutant displayed WT-like *flv3A* transcript and protein levels, the  $\Delta flv3A$  mutant  
368 showed an elevated *flv1A* transcript level compared to the WT (Supplemental Figure 4C).  
369 This shows that the inhibition of O<sub>2</sub> photoreduction in  $\Delta flv3A$  is not due to the  
370 downregulation of other FDPs. No contribution of the SynFlv3/Flv3 homo-oligomer in the  
371 Mehler-like reaction was observed *in vivo* (Mustila et al., 2016), contrary to previous *in vitro*  
372 studies suggesting a function of SynFlv3/Flv3 homo-oligomers in NAD(P)H-dependent O<sub>2</sub>  
373 reduction (Vicente et al., 2002, Brown et al., 2019). Instead, a possible photoprotective  
374 function of SynFlv3/Flv3 homo-oligomers *via* an unknown electron transport network was  
375 proposed (Mustila et al., 2016). In *Anabaena*  $\Delta flv1A$  mutant, AnaFlv3A/Flv3A homo-  
376 oligomers may, for example, be involved in controlling the cation homeostasis, which in turn  
377 may affect the reversible association of AnaFlv2/Flv4 hetero-oligomers with the thylakoid  
378 membrane, and consequently, their involvement in O<sub>2</sub> photoreduction. It is also important to  
379 note that the oligomer formation scenario in the mutants might be different in *Anabaena* WT  
380 filaments. Overall, the obtained results suggest an important role for AnaFlv3A, but not  
381 AnaFlv1A, in mediating steady-state O<sub>2</sub> photoreduction under diazotrophic LC conditions in  
382 an AnaFlv2/Flv4-dependent. Moreover, in LC but not in HC conditions, the lack of both  
383 AnaFlv1A and AnaFlv3A resulted in a more severe delay in induction of O<sub>2</sub> evolution during  
384 dark-to-light transition in comparison to the lack of AnaFlv3A only (Figure 3). This suggests  
385 that AnaFlv1A may also function in coordination with AnaFlv2/4 independently of Flv3A in  
386 an unknown role that facilitates photosynthetic electron transport. Understanding the exact  
387 functions of AnaFlv2 and/or AnaFlv4 in these processes and their interactions with  
388 AnaFlv1A and AnaFlv3A requires further investigation.

389 Even though AnaFlv1A and AnaFlv3A contribute to the Mehler-like reaction to different  
390 extents, both  $\Delta flv1A$  and  $\Delta flv3A$  mutants exhibited reduced CCM activity, as deduced from  
391 lowered initial peaks in CO<sub>2</sub> uptake rate during dark-to-light transition and reduction of

392 steady-state CO<sub>2</sub> uptake in comparison to WT (Supplemental Figure 8B, Supplemental Table  
393 1). This is likely to result from impaired energization of CCM in the absence of AnaFlv1A or  
394 AnaFlv3A. SynFlv1 and SynFlv3 have been shown to have a crucial role in the generation of  
395 *pmf* during the dark-to-light transition (Nikkanen et al., 2020), comparable to that of FLVA/B  
396 in *P. patens* (Gerotto et al., 2016) and *C. reinhardtii* (Chaux et al., 2017). Moreover, the *pmf*  
397 generated by FDPs and CET has been recently shown to be important for inducing and  
398 maintaining CCM activity in *C. reinhardtii* (Burlacot et al., 2021). We hypothesize that  
399 AnaFlv1A/Flv3A hetero-oligomer is required to rapidly induce the Mehler-like reaction,  
400 likely being important for the generation of *pmf* and possibly for induction of CCM activity  
401 during the dark-to-light transition. The molecular mechanism of the FDP-dependency of the  
402 CCM requires further investigation however, as the mechanisms of CCM differ between  
403 *Chlamydomonas* and cyanobacteria (Price et al 2008). Moreover, in *Synechocystis* mutants  
404 lacking Flv1/3 *pmf* generation during the first minute of dark-to-light transitions is severely  
405 impaired, CCM induction is largely unaffected at least in standard conditions (Nikkanen et  
406 al., 2020). In *Anabaena* however, both  $\Delta flv1A$  and  $\Delta flv3A$  strains demonstrated impaired  
407 induction of CCM (Supplemental Figure 8B), suggesting that *Anabaena* may differ from  
408 *Synechocystis* in the extent to which CCM induction is *pmf*-dependent.

409 Compelling evidence has recently been provided for dynamic coordination and functional  
410 redundancy between NDH-1 and SynFlv1/Flv3, jointly contributing to efficient oxidation of  
411 PSI in *Synechocystis* (Nikkanen et al., 2020) and in *Physcomitrella patens* (Storti et al.,  
412 2020a, 2020b). NDH-1-mediated cyclic electron transport (CET) in *Anabaena* could also  
413 partially compensate for a lack of AnaFlv1A and AnaFlv3A as evidenced by a stronger F<sub>0</sub>  
414 rise observed in both mutants (Supplemental Figure 3A). Unlike *Synechocystis* cells,  
415 *Anabaena* filaments express orthologs of plastid terminal oxidase (PTOX, *all2096*)  
416 (McDonald et al., 2003). It has been proposed that in *C. reinhardtii* and vascular plants,  
417 PTOX functions as an electron valve directing electrons from plastoquinol to O<sub>2</sub>, thereby  
418 controlling the redox state of the PQ pool (Stepien and Johnson, 2018, Saroussi et al., 2019;  
419 Nawrocki et al., 2019) and being involved in diverse metabolic processes such as the  
420 regulation of CET, state transition and carotenoid biosynthesis (Nawrocki et al., 2019). We  
421 cannot exclude possible contribution of PTOX to the residual O<sub>2</sub> photoreduction observed in  
422 the  $\Delta flv3A$  mutant (Figure 3A), and/or as a sensor of the redox state of the PQ pool and  
423 regulator of NDH-dependent CET, thus limiting electron pressure on the acceptor-side of PSI  
424 (Bolte et al., 2020).

425

426 **Inactivation of AnaFlv3A leads to enhanced nitrogenase-based H<sub>2</sub> photoproduction**  
427 **under oxic conditions**

428 Demonstration of elevated photoproduction of H<sub>2</sub> gas in diazotrophic filaments lacking  
429 vegetative cell-specific AnaFlv3A under oxic and microoxic conditions (Figure 4) provided  
430 intriguing information about bioenergetic interdependence between vegetative cells and  
431 heterocysts. The heterocyst-originated production of H<sub>2</sub> in the  $\Delta flv3A$  mutant was rapidly  
432 induced upon exposing the filaments to light and occurred concomitantly with the evolution  
433 of O<sub>2</sub> in neighbouring vegetative cells (Figure 3). Moreover, the rate of H<sub>2</sub> photoproduction  
434 in the  $\Delta flv3A$  mutant responded positively to an increase in CO<sub>2</sub> availability (Figure 3B).

435 In the absence of N<sub>2</sub>, the main substrate for nitrogenase, all electrons can be directed to H<sub>2</sub>  
436 production (Hoffman et al., 2014) allowing a less costly reaction, whereby only 4 moles of  
437 ATP are required to produce one mole of H<sub>2</sub>. In this work, the removal of N<sub>2</sub> substrate (by  
438 replacement with Ar) led to a 10-fold increase of H<sub>2</sub> photoproduction rate in  $\Delta flv3A$ ,  
439 demonstrating the occurrence of nitrogenase-dependent H<sub>2</sub> photoproduction in this mutant  
440 (Figure 4A). A recent report suggested that overexpressing Flv3B lead to more stable  
441 microoxic conditions inside the heterocysts, notably increasing the H<sub>2</sub> production yield,  
442 presumably *via* the bidirectional hydrogenase Hox (Roumezi et al., 2020). In contrast to the  
443 unidirectional production of H<sub>2</sub> by nitrogenase, Hox catalyzes the reversible reduction of  
444 protons to H<sub>2</sub> (Bothe et al., 2010). We do not consider the contribution of Hox to the  
445 photoproduction of H<sub>2</sub> by the  $\Delta flv3A$  mutant, as the net production does not fit with the  
446 bidirectional nature of the enzyme. Moreover, significant downregulation in the  $\Delta flv3A$   
447 mutant of transcripts from *hoxH*, encoding one of the subunits (Supplemental Figure 9B)  
448 further supports this assumption. Altogether, these results indicate that the increased light-  
449 induced H<sub>2</sub> photoreduction of the  $\Delta flv3A$  mutant is mediated by nitrogenase activity.

450 Strikingly, it turned out that the increase in H<sub>2</sub> photoproduction yield in the  $\Delta flv3A$  mutant  
451 was due to significant downregulation of HupL, the large subunit of the uptake hydrogenase,  
452 evidenced both at the transcript and protein levels (Figure 4C, 4D). The absence of functional  
453 Hup suppressed the H<sub>2</sub> recycling pathway (Figure 4B) and caused the release of H<sub>2</sub>,  
454 photoproduced by nitrogenase, from the heterocysts of  $\Delta flv3A$  filaments (Figure 3, Figure  
455 4A). Thereby, our results highlight a regulatory network between the two metabolic processes

456 in different compartments: The Flv3A-mediated metabolic processes in the vegetative cells  
457 and the H<sub>2</sub> metabolism in the heterocysts. It is likely that the redox state of the PQ pool in  
458 vegetative cells, affected by the activity of Flv3A, has a regulatory role on the H<sub>2</sub> metabolism  
459 in heterocysts. However, the nature of the molecular signal from reduced PQ that ultimately  
460 regulates gene expression in heterocysts remains unknown. The redox state of the PQ pool in  
461 likely correlates with the availability of soluble reducing cofactors in the cytosol of  
462 vegetative cells, and while evidence in *Anabaena* is lacking, those cofactors may be  
463 interchanged between vegetative cells and heterocysts, inducing changes in metabolism and  
464 gene expression. A majority of the NADPH needed for the nitrogen metabolism in  
465 heterocysts is understood to be derived from the oxidative pentose phosphate pathway  
466 breaking down carbohydrates imported from vegetative cells, (Cumino et al., 2007) but it is  
467 plausible that more direct exchange of cofactors also occurs, analogously to the malate redox  
468 shuttle between cytosol and the chloroplast in plants and algae. Nevertheless, the molecular  
469 mechanism underlying this regulatory network between different cell types needs further  
470 elucidation.

471 Taken together, our results demonstrate that similarly to SynFlv1 and SynFlv3, both  
472 vegetative-cells specific AnaFlv1A and AnaFlv3A are indispensable under harsh FL  
473 conditions regardless of nitrogen or CO<sub>2</sub> availability, most likely maintaining sufficient  
474 oxidation of the photosynthetic electron transport chain by catalysing the Mehler-like  
475 reaction as AnaFlv1A/Flv3A hetero-oligomers. Under LC, AnaFlv3A is able to perform  
476 moderate O<sub>2</sub> photoreduction in coordination with AnaFlv2 and AnaFlv4 proteins and  
477 independently of AnaFlv1A. AnaFlv3A may either stimulate the activity of AnaFlv2/Flv4  
478 hetero-oligomers indirectly via an unknown function, or participate in forming functional  
479 hetero-oligomers with AnaFlv2 and Flv4. The deletion of AnaFlv3A was concomitant with  
480 the downregulation of the heterocyst-specific Hup enzyme resulting in increased  
481 bioproduction of H<sub>2</sub>. This novel regulatory network between the metabolisms of carbon and  
482 nitrogen as well as response to oxidative stress in diazotrophic *Anabaena*, might represent an  
483 unexploited source for the future of biotechnological applications.

484

## 485 **Materials and Methods**

### 486 **Strains and culture conditions**

487 *Anabaena* sp. PCC 7120 strain was used as the wild-type (WT) in this study. The  $\Delta flvIA$  and  
488  $\Delta flv3A$  mutants (Allahverdiyeva et al., 2013) and the  $\Delta hupL$  mutant (Masukawa et al., 2002)  
489 were previously reported. For construction of the double mutant  $\Delta flvIA/flv3A$ , the BamHI-  
490 XbaI region of the mutated *flvIA* construct was replaced with the  
491 spectinomycin/streptomycin resistance cassette. The generated plasmid was transferred into  
492  $\Delta flv3A$  and sucrose, neomycin, and spectinomycin was used for selection. Segregation of the  
493 mutants was verified by PCR. Culture stocks of  $\Delta flvIA$  and  $\Delta flv3A$  mutants were maintained  
494 in BG-11 medium supplemented with 40  $\mu\text{g mL}^{-1}$  neomycin, while the  $\Delta hupL$  mutant was  
495 supplemented with 20  $\mu\text{g mL}^{-1}$  spectinomycin.

496 Pre-cultures were grown in Z8x medium (lacking combined nitrogen, pH 7.0-7.3, Kotai,  
497 1972) at 30 °C and under constant white light of 75  $\mu\text{mol photons m}^{-2} \text{s}^{-1}$  without antibiotics.  
498 For this, the filaments were inoculated at  $\text{OD}_{750} = 0.1$  in 200 mL Z8x medium (in 500 mL  
499 flasks) and were continuously bubbled with air (0.04%  $\text{CO}_2$ , LC) or with air supplemented  
500 with 1%  $\text{CO}_2$  (HC) if not specifically mentioned. Pre-cultures were harvested at the  
501 logarithmic growth phase, inoculated at  $\text{OD}_{750} = 0.1$  in fresh Z8x medium and experimental  
502 cultures were grown under similar pre-experimental conditions (75  $\mu\text{mol photons m}^{-2} \text{s}^{-1}$   
503 illumination and bubbling with air or 1%  $\text{CO}_2$  supplemented). For all physiological  
504 measurements and transcription profiling, experimental cultures were harvested after 4 days  
505 of growth and experiments were conducted in 3-5 independent biological replicates.

#### 506 **Determination of heterocyst frequency**

507 Alcian blue was used to stain the polysaccharide layer of the heterocyst envelope. Cell  
508 suspensions were mixed (1:8) with a solution of 0.5% Alcian Blue stain in 50% ethanol-  
509 water. Stained samples were visualized using a Wetzlar light microscope (Leitz) and x400  
510 magnification micrographs were taken. Around 1000-2000 cells were counted per sample,  
511 and the heterocyst frequency was determined as a percentage of total cells counted.

#### 512 **Viability analysis**

513 For viability analysis, pre-cultures were grown in BG-11o under air supplemented with 3%  
514  $\text{CO}_2$  and serial dilutions of cell suspension, from  $\text{OD}_{750}$  1.0 until  $10^{-3}$ , were prepared. From  
515 each dilution, 5  $\mu\text{L}$  were dropped on solid BG-11o (without combined nitrogen) agar plates.  
516 The plates were cultivated for 4 days under ambient air or air supplemented with 3%  $\text{CO}_2$ .

517 **MIMS measurements**

518 *In vivo* measurements of  $^{16}\text{O}_2$  ( $m/z = 32$ ),  $^{18}\text{O}_2$  ( $m/z = 36$ ),  $\text{CO}_2$  ( $m/z = 44$ ) and  $\text{H}_2$  ( $m/z = 2$ )  
519 fluxes were monitored using a membrane inlet mass spectrometry (MIMS) as described  
520 previously (Mustila et al., 2016). Harvested filaments were resuspended with fresh Z8x  
521 medium, adjusted to Chl *a*  $10 \mu\text{g mL}^{-1}$  and acclimated for 1 hr to the growth conditions. For  
522 LC samples, the concentration of dissolved total inorganic carbon was saturated with 1.5 mM  
523  $\text{NaHCO}_3$  before the measurement.

524 To measure Deuterium uptake, the filaments were flushed with Ar inside gas-tight vials for  
525 15 min, then 1.2 mL pure  $\text{D}_2$  (2 % in headspace) was injected into each vial. Changes of  $\text{D}_2$  in  
526 the gas phase were measured at 2 h and 24 h after  $\text{D}_2$  addition. 250  $\mu\text{L}$  gas sample from the  
527 headspace of the vials was injected into the MIMS chamber. The calibration of  $\text{D}_2$   
528 concentration was performed by injecting known concentrations of  $\text{D}_2$  into the media.

529 **Fluorescence analysis**

530 A pulse amplitude modulated fluorometer Dual-PAM-100 (Walz) was used to monitor Chl *a*  
531 fluorescence and P700 absorbance, independently. Harvested filaments were resuspended in  
532 fresh Z8x medium to the Chl *a* concentration of  $15 \mu\text{g mL}^{-1}$  and then kept for about 1 hr  
533 under the growth conditions. Before the measurements, samples were dark-adapted for 10  
534 min. The measurement started with a saturating pulse in darkness to determine  $F_m^D$ . Then, the  
535 samples were illuminated with red actinic light at a photon flux density of  $50 \mu\text{mol photons}$   
536  $\text{m}^{-2} \text{s}^{-1}$  for 380 s whilst saturating pulses ( $5000 \mu\text{mol photons m}^{-2} \text{s}^{-1}$ , 400 ms) were given  
537 every minute (SP1-SP9). Photosynthetic parameters were determined as described previously  
538 (Huokko et al 2017).

539 **Determination of P700 and Fd redox changes from near-infrared absorbance**

540 The absorbance differences at 780–820 nm, 820–870 nm, 840–965 nm and 870–965 nm were  
541 measured with the Dual KLAS/NIR spectrophotometer (Walz). Redox change kinetics of  
542 P700 and Fd were deconvoluted from the four difference signals using differential model  
543 plots (model spectra) (Supplemental Figure 10) that were measured for *Anabaena* using  
544 protocols described earlier (Theune et al., 2021) with the modification for the Fd model  
545 spectrum, we used the  $\Delta flv1A/\Delta flv3A$  mutant instead of anoxic conditions to impair the  
546 Mehler-like reaction (see Figure 2) and to sufficiently slow down the re-oxidation Fd. For

547 P700 and plastocyanin (PC) model spectra, we used WT *Anabaena* filaments. Due to low  
548 signal quality, the PC traces were omitted from Figure 2. As noted for *Synechocystis* earlier  
549 (Theune et al., 2021), it is likely that the redox kinetics of P700 and PC in *Anabaena* may be  
550 closely related, thus making it difficult to extract a PC signal of large magnitude.

551 Experimental cultures, as well as cultures used for determination of the model spectra, were  
552 grown at 50  $\mu\text{mol photons m}^{-2} \text{ s}^{-1}$  and under air-level  $\text{CO}_2$  (LC) in Z8x medium for 4 days,  
553 then adjusted to *Chl a* concentration of 20  $\mu\text{g mL}^{-1}$  by reinoculating pelleted cells in fresh  
554 medium. Cells were dark-adapted for 10 min, after which absorbance differences of the four  
555 wavelength pairs were measured during 5 s actinic illumination at 500  $\mu\text{mol photons m}^{-2} \text{ s}^{-1}$   
556 and subsequent dark. The maximal levels of P700 oxidation and Fd reduction were  
557 determined for each sample by utilizing the NIRMAX script (Klughammer and Schreiber  
558 2016), and the obtained experimental deconvoluted traces were then normalized to the  
559 maximal values. The Dual-KLAS/NIR measurement of *Synechocystis*  $\Delta flv1$  cells was  
560 performed as described previously (Nikkanen et al., 2020).

#### 561 **H<sub>2</sub> measurement by Clark-type electrode**

562 H<sub>2</sub> concentration was monitored under anaerobic conditions using a Clark-type Pt-Ag/AgCl  
563 electrode chamber (DW1/AD, Hansatech) connected to a homemade polarographic box.  
564 Experimental cultures were harvested, resuspended in fresh Z8x medium and adjusted to the  
565 *Chl a* concentration of about 3-4  $\mu\text{g mL}^{-1}$ . The resulting suspensions (~30 mL) were  
566 transferred into 75 mL glass vials, sealed and sparged with either nitrogen (N<sub>2</sub>) or argon (Ar)  
567 for 30 min in the dark to achieve anaerobic conditions. Then, cultures were incubated under  
568 the corresponding atmosphere for another 2 h in the dark at 25 °C. 4 mL of dark-adapted  
569 suspension were transferred into the chamber with an anaerobic gas-tight syringe and H<sub>2</sub>  
570 concentration was monitored during 6 min illumination with actinic light of 800  $\mu\text{mol}$   
571  $\text{photons m}^{-2} \text{ s}^{-1}$  after which the light was switched off. The H<sub>2</sub> production rates were  
572 calculated using linear regression.

#### 573 **Nitrogenase activity assay**

574 Acetylene reduction assay was used to determine nitrogenase activity as described previously  
575 (Leino et al. 2014). 5 mL of experimental samples were transferred into 23 mL vials, flushed  
576 with argon for 20 min and supplemented with 10% acetylene in the headspace. Vials were



577 kept for 20 hr under 50  $\mu\text{mol photons m}^{-2} \text{s}^{-1}$  at 30 °C with gentle agitation (120 rpm). After  
578 this, 20  $\mu\text{L}$  of gas sample was withdrawn from the headspace of the vial and analysed for  
579 ethylene content using a gas chromatograph equipped with Carboxen®-1010 PLOT Capillary  
580 Column and FID detector. The enzyme activity was calculated from the peak area and  
581 normalised to the total protein content.

## 582 **Chl *a* and total sugar determination**

583 Chl *a* was extracted from cells in 90% methanol and the concentration was determined by  
584 measuring absorbance at 665 nm and multiplying it with the extinction coefficient factor 12.7  
585 (Meeks & Castenholz, 1971). For total sugar determination, 1 mL of experimental samples  
586 were collected, washed and diluted to 1:1 with MQ-water before the sugar measurement.  
587 Total sugar content was obtained using the colourimetric method described earlier (DuBois et  
588 al., 1956).

## 589 **Protein extraction and immunoblotting**

590 Total protein extracts were isolated as described previously (Zhang et al., 2009).  
591 Electrophoresis and immunoblotting were performed according to an earlier report (Mustila  
592 et al., 2016). Protein-specific antibodies raised against Flv3A (Agrisera), PsaB (AS10 695,  
593 Agrisera), NdhK (Agrisera), and HupL (kindly provided by P. Tamagnini) were used in this  
594 study.

## 595 **RNA isolation and RT-qPCR analysis**

596 Isolation of total RNA, reverse transcription and qPCR analysis was performed as described  
597 earlier (Ermakova et al., 2013). *rnpB* gene was used as a reference for normalization. The  
598 primer pairs used in this study are listed in Table 3.

599 **Table 2.** Oligonucleotide sequences used for qPCR.

| Gene name                      | Forward primer (5' →3') | Reverse primer (3' →5') |
|--------------------------------|-------------------------|-------------------------|
| <i>flv2</i> ( <i>all4444</i> ) | cgacttttgcccaacttta     | gatcgccatcataattcctg    |
| <i>flv4</i> ( <i>all4446</i> ) | ctgctattcgtgtttggat     | ttcactaagccgctatggtc    |
| <i>hupL_mature</i>             | agtagccgcttctacgatga    | acccaaccacacaggttcta    |
| <i>hoxH</i>                    | gggacaaatcctccaatccc    | tttgctcctccaacacttc     |

*mpB*

ggactaggggttggggact

acgagggcgattatctatctg

600

## 601 **Acknowledgements**

602 We thank Prof. Paula Tamagnini for the HupL antibody.

## 603 **Funding**

604 This work was supported by the NordForsk Nordic Center of Excellence “NordAqua” (no.  
605 82845 to Y.A.), the Academy of Finland (project no. 315119 to Y.A).

606 **Authors contribution:** Y.A. conceived the study, A.S-S., G.T., M.E., L.N, S.K., and Y.A.  
607 designed the research. A.S-S. performed most of the experiments. M.E. performed growth  
608 characterization of the mutants. L.N. performed KLAS-NIR, S.K measured H<sub>2</sub> production  
609 using the electrode. M.H. performed Deuterium uptake experiment. G.T performed RT-qPCR  
610 experiments and J.W constructed an independent  $\Delta flv3A$  mutant. A.S.S. drafted the  
611 manuscript and all authors revised and approved it.

612

## 613 **List of supplemental data**

- 614 ● Supplemental Figure 1. Title. The genomic structure of *Anabaena*  $\Delta flv1A$  and  $\Delta flv3A$   
615 mutants used in this work.
- 616 ● Supplemental Figure 2. Title. Growth characterization of WT,  $\Delta flv1A$  and  $\Delta flv3A$   
617 filaments.
- 618 ● Supplemental Figure 3. Title. F<sub>0</sub> rise of *Anabaena* WT,  $\Delta flv1A$  and  $\Delta flv3A$ .
- 619 ● Supplemental Figure 4. Title. Analyses of transcript and protein abundance in the  
620 diazotrophic WT,  $\Delta flv1A$  and  $\Delta flv3A$  filaments.
- 621 ● Supplemental Figure 5. DUAL-KLAS-NIR kinetics of P700, PC and Fd in  
622 *Synechocystis*  $\Delta flv1$  mutant.
- 623 ● Supplemental Figure 6. Title. Fluorescence induction curves of diazotrophic  
624 *Anabaena*  $\Delta flv1A/3A$  cultivated under LC or HC.
- 625 ● Supplemental Figure 7. Title. O<sub>2</sub> exchange rates of the non-diazotrophic  
626 *Synechocystis*  $\Delta flv1$  mutant.

- 627       • Supplemental Figure 8. Title. Gas exchange analysis of the diazotrophic *Anabaena*  
628       filaments.
- 629       • Supplemental Figure 9. Title. H<sub>2</sub> metabolism in diazotrophic filaments of *Anabaena*  
630       WT and FDP mutants.
- 631       • Supplemental Figure 10. Title. Differential model blots (DMPs) for deconvolution of  
632       PC, P700, and Fd signals with the DUAL-KLAS-NIR spectrometer
- 633       • Supplemental Table 1. Title. Rates of CO<sub>2</sub> and O<sub>2</sub> exchange in WT,  $\Delta flv1A$ , and  
634        $\Delta flv3A$  filaments grown under air (LC) or in the air supplemented with 1% CO<sub>2</sub> (HC).

## 635   **References**

- 636   Allahverdiyeva, Y., Ermakova, M., Eisenhut, M., Zhang, P., Richaud, P., Hagemann, M., ...  
637   & Aro, E. M. (2011). Interplay between flavodiiron proteins and photorespiration in  
638   *Synechocystis* sp. PCC 6803. *Journal of Biological Chemistry*, 286(27), 24007-24014.
- 639   Allahverdiyeva, Y., Mustila, H., Ermakova, M., Bersanini, L., Richaud, P., Ajlani, G., ... &  
640   Aro, E. M. (2013). Flavodiiron proteins Flv1 and Flv3 enable cyanobacterial growth and  
641   photosynthesis under fluctuating light. *Proceedings of the National Academy of Sciences*,  
642   110(10), 4111-4116.
- 643   Allahverdiyeva, Y., Isojärvi, J., Zhang, P., & Aro, E. M. (2015). Cyanobacterial oxygenic  
644   photosynthesis is protected by flavodiiron proteins. *Life*, 5(1), 716-743.
- 645   Bailey, S., Melis, A., Mackey, K. R., Cardol, P., Finazzi, G., van Dijken, G., ... &  
646   Grossman, A. (2008). Alternative photosynthetic electron flow to oxygen in marine  
647   *Synechococcus*. *Biochimica et Biophysica Acta (BBA)-Bioenergetics*, 1777(3), 269-276.
- 648   Bolte, S., Marcon, E., Jaunario, M., Moyet, L., Paternostre, M., Kuntz, M., & Krieger-  
649   Liszkay, A. (2020). Dynamics of the localization of the plastid terminal oxidase inside the  
650   chloroplast. *Journal of Experimental Botany*, 71(9), 2661-2669.
- 651   Bothe, H., Schmitz, O., Yates, M. G., & Newton, W. E. (2010). Nitrogen fixation and  
652   hydrogen metabolism in cyanobacteria. *Microbiology and molecular biology reviews*,  
653   74(4), 529-551.

- 654 Braakman, R., Follows, M. J., & Chisholm, S. W. (2017). Metabolic evolution and the self-  
655 organization of ecosystems. *Proceedings of the National Academy of Sciences*, 114(15),  
656 E3091-E3100.
- 657 Brown, K. A., Guo, Z., Tokmina-Lukaszewska, M., Scott, L. W., Lubner, C. E., Smolinski,  
658 S., ... & King, P. W. (2019). The oxygen reduction reaction catalyzed by *Synechocystis*  
659 sp. PCC 6803 flavodiiron proteins. *Sustainable Energy & Fuels*, 3(11), 3191-3200.
- 660 Cai, Y., & Wolk, C. P. (1997). *Anabaena* sp. strain PCC 7120 responds to nitrogen  
661 deprivation with a cascade-like sequence of transcriptional activations. *Journal of*  
662 *Bacteriology*, 179(1), 267-271.
- 663 Chaux, F., Burlacot, A., Mekhalfi, M., Auroy, P., Blangy, S., Richaud, P., & Peltier, G.  
664 (2017). Flavodiiron proteins promote fast and transient O<sub>2</sub> photoreduction in  
665 *Chlamydomonas*. *Plant physiology*, 174(3), 1825-1836.
- 666 Chen, M., Li, J., Zhang, L., Chang, S., Liu, C., Wang, J., & Li, S. (2014). Auto-flotation of  
667 heterocyst enables the efficient production of renewable energy in cyanobacteria.  
668 *Scientific reports*, 4(1), 1-9.
- 669 Cumino, A.C., Marcozzi, C., Barreiro, R., & Salerno, G.L. Carbon cycling in *Anabaena* sp.  
670 PCC 7120. Sucrose synthesis in the heterocysts and possible role in nitrogen fixation.  
671 *Plant Physiology*, 143, 1385–1397.
- 672 Daley, S. M., Kappell, A. D., Carrick, M. J., & Burnap, R. L. (2012). Regulation of the  
673 cyanobacterial CO<sub>2</sub>-concentrating mechanism involves internal sensing of NADP<sup>+</sup> and  
674  $\alpha$ -ketogutarate levels by transcription factor CcmR. *PLoS One*, 7(7), e41286.
- 675 Eisenhut, M., Georg, J., Klähn, S., Sakurai, I., Mustila, H., Zhang, P., ... & Aro, E. M.  
676 (2012). The antisense RNA As1<sub>flv4</sub> in the cyanobacterium *Synechocystis* sp. PCC 6803  
677 prevents premature expression of the flv4-2 operon upon shift in inorganic carbon supply.  
678 *Journal of Biological Chemistry*, 287(40), 33153-33162.
- 679 Elanskaya, I. V., Bulychev, A. A., Lukashev, E. P., & Muronets, E. M. (2021). Deficiency  
680 in flavodiiron protein Flv3 promotes cyclic electron flow and state transition under high  
681 light in the cyanobacterium *Synechocystis* sp. PCC 6803. *Biochimica et Biophysica Acta*  
682 *(BBA)-Bioenergetics*, 1862(1), 148318.

- 683 Ermakova, M., Battchikova, N., Richaud, P., Leino, H., Kosourov, S., Isojärvi, J., ... & Aro,  
684 E. M. (2014). Heterocyst-specific flavodiiron protein Flv3B enables oxic diazotrophic  
685 growth of the filamentous cyanobacterium *Anabaena* sp. PCC 7120. *Proceedings of the*  
686 *National Academy of Sciences*, *111*(30), 11205-11210.
- 687 Ermakova, M., Battchikova, N., Allahverdiyeva, Y., & Aro, E. M. (2013). Novel  
688 heterocyst-specific flavodiiron proteins in *Anabaena* sp. PCC 7120. *FEBS letters*, *587*(1),  
689 82-87.
- 690 Flaherty, B. L., Van Nieuwerburgh, F., Head, S. R., & Golden, J. W. (2011). Directional  
691 RNA deep sequencing sheds new light on the transcriptional response of *Anabaena* sp.  
692 strain PCC 7120 to combined-nitrogen deprivation. *BMC genomics*, *12*(1), 1-10.
- 693 Forchhammer, K., & Selim, K. A. (2020). Carbon/nitrogen homeostasis control in  
694 cyanobacteria. *FEMS microbiology reviews*, *44*(1), 33-53.
- 695 Gerotto, C., Alboresi, A., Meneghesso, A., Jokel, M., Suorsa, M., Aro, E. M., &  
696 Morosinotto, T. (2016). Flavodiiron proteins act as safety valve for electrons in  
697 *Physcomitrella patens*. *Proceedings of the National Academy of Sciences*, *113*(43),  
698 12322-12327.
- 699 González, A., Bes, M. T., Valladares, A., Peleato, M. L., & Fillat, M. F. (2012). FurA is the  
700 master regulator of iron homeostasis and modulates the expression of tetrapyrrole  
701 biosynthesis genes in *Anabaena* sp. PCC 7120. *Environmental microbiology*, *14*(12),  
702 3175-3187.
- 703 González, A., Angarica, V. E., Sancho, J., & Fillat, M. F. (2014). The FurA regulon in  
704 *Anabaena* sp. PCC 7120: in silico prediction and experimental validation of novel target  
705 genes. *Nucleic Acids Research*, *42*(8), 4833-4846.
- 706 Guío, J., Sarasa-Buisan, C., Velázquez-Campoy, A., Bes, M. T., Fillat, M. F., Peleato, M.  
707 L., & Sevilla, E. (2020). 2-oxoglutarate modulates the affinity of FurA for the *ntcA*  
708 promoter in *Anabaena* sp. PCC 7120. *FEBS letters*, *594*(2), 278-289.
- 709 Hackenberg, C., Engelhardt, A., Matthijs, H. C., Wittink, F., Bauwe, H., Kaplan, A., &  
710 Hagemann, M. (2009). Photorespiratory 2-phosphoglycolate metabolism and

- 711 photoreduction of O<sub>2</sub> cooperate in high-light acclimation of *Synechocystis* sp. strain PCC  
712 6803. *Planta*, 230(4), 625-637.
- 713 Helman, Y., Tchernov, D., Reinhold, L., Shibata, M., Ogawa, T., Schwarz, R., ... & Kaplan,  
714 A. (2003). Genes encoding A-type flavoproteins are essential for photoreduction of O<sub>2</sub> in  
715 cyanobacteria. *Current Biology*, 13(3), 230-235.
- 716 Hoffman, B. M., Lukoyanov, D., Yang, Z. Y., Dean, D. R., & Seefeldt, L. C. (2014).  
717 Mechanism of nitrogen fixation by nitrogenase: the next stage. *Chemical reviews*, 114(8),  
718 4041-4062.
- 719 Howe, C., Becker, D., Steinweg, C., Posten, C., & Stensjö, K. (2020). Iron limitation—A  
720 perspective on a growth-restricted cultivation strategy for a H<sub>2</sub> production system using  
721 the diazotrophic cyanobacterium *Nostoc* PCC 7120  $\Delta hupW$ . *Bioresource Technology*  
722 Reports, 11, 100508.
- 723 Huokko, Tuomas, et al. "Role of type 2 NAD (P) H dehydrogenase NdbC in redox  
724 regulation of carbon allocation in *Synechocystis*." *Plant physiology* 174.3 (2017): 1863-  
725 1880.
- 726 Jiang, Y. L., Wang, X. P., Sun, H., Han, S. J., Li, W. F., Cui, N., ... & Zhou, C. Z. (2018).  
727 Coordinating carbon and nitrogen metabolic signaling through the cyanobacterial global  
728 repressor NdhR. *Proceedings of the National Academy of Sciences*, 115(2), 403-408.
- 729 Jokel, M., Johnson, X., Peltier, G., Aro, E. M., & Allahverdiyeva, Y. (2018). Hunting the  
730 main player enabling *Chlamydomonas reinhardtii* growth under fluctuating light. *The*  
731 *Plant Journal*, 94(5), 822-835.
- 732 Khetkorn, W., Baebprasert, W., Lindblad, P., & Incharoensakdi, A. (2012). Redirecting the  
733 electron flow towards the nitrogenase and bidirectional Hox-hydrogenase by using  
734 specific inhibitors results in enhanced H<sub>2</sub> production in the cyanobacterium *Anabaena*  
735 *siamensis* TISTR 8012. *Bioresource technology*, 118, 265-271.
- 736 Klähn, S., Orf, I., Schwarz, D., Matthiessen, J. K., Kopka, J., Hess, W. R., & Hagemann,  
737 M. (2015). Integrated transcriptomic and metabolomic characterization of the low-carbon  
738 response using an *ndhR* mutant of *Synechocystis* sp. PCC 6803. *Plant Physiology*, 169(3),  
739 1540-1556.

- 740 Kotai, J. (1972). Instructions for preparation of modified nutrient solution Z8 for algae.  
741 Norwegian Institute for Water Research, Oslo, 11(69), 5..
- 742 Latifi, A., Jeanjean, R., Lemeille, S., Havaux, M., & Zhang, C. C. (2005). Iron starvation  
743 leads to oxidative stress in *Anabaena* sp. strain PCC 7120. *Journal of Bacteriology*,  
744 187(18), 6596-6598.
- 745 Leino, H., Shunmugam, S., Isojärvi, J., Oliveira, P., Mulo, P., Saari, L., ... &  
746 Allahverdiyeva, Y. (2014). Characterization of ten H<sub>2</sub> producing cyanobacteria isolated  
747 from the Baltic Sea and Finnish lakes. *International Journal of Hydrogen Energy*, 39(17),  
748 8983-8991.
- 749 Liran, O., Shemesh, E., & Tchernov, D. (2018). Investigation into the CO<sub>2</sub> concentrating  
750 step rates within the carbon concentrating mechanism of *Synechocystis* sp. PCC6803 at  
751 various pH and light intensities reveal novel mechanistic properties. *Algal research*, 33,  
752 419-429.
- 753 Masukawa, H., Mochimaru, M., & Sakurai, H. (2002). Disruption of the uptake  
754 hydrogenase gene, but not of the bidirectional hydrogenase gene, leads to enhanced  
755 photobiological hydrogen production by the nitrogen-fixing cyanobacterium *Anabaena*  
756 sp. PCC 7120. *Applied Microbiology and Biotechnology*, 58(5), 618-624.
- 757 McDonald, A. E., Amirsadeghi, S., & Vanlerberghe, G. C. (2003). Prokaryotic orthologues  
758 of mitochondrial alternative oxidase and plastid terminal oxidase. *Plant molecular*  
759 *biology*, 53(6), 865-876.
- 760 Meeks, J. C., & Castenholz, R. W. (1971). Growth and photosynthesis in an extreme  
761 thermophile, *Synechococcus lividus* (Cyanophyta). *Archiv für Mikrobiologie*, 78(1), 25-  
762 41.
- 763 Mi, H., Endo, T., Ogawa, T., & Asada, K. (1995). Thylakoid membrane-bound, NADPH-  
764 specific pyridine nucleotide dehydrogenase complex mediates cyclic electron transport in  
765 the cyanobacterium *Synechocystis* sp. PCC 6803. *Plant and Cell Physiology*, 36(4), 661-  
766 668.
- 767 Mitschke, J., Vioque, A., Haas, F., Hess, W. R., & Muro-Pastor, A. M. (2011). Dynamics  
768 of transcriptional start site selection during nitrogen stress-induced cell differentiation in

- 769 Anabaena sp. PCC7120. Proceedings of the National Academy of Sciences, 108(50),  
770 20130-20135.
- 771 Mustila, H., Paananen, P., Battchikova, N., Santana-Sánchez, A., Muth-Pawlak, D.,  
772 Hagemann, M., ... & Allahverdiyeva, Y. (2016). The flavodiiron protein Flv3 functions as  
773 a homo-oligomer during stress acclimation and is distinct from the Flv1/Flv3 hetero-  
774 oligomer specific to the O<sub>2</sub> photoreduction pathway. *Plant and Cell Physiology*, 57(7),  
775 1468-1483.
- 776 Nawrocki, W. J., Buchert, F., Joliot, P., Rappaport, F., Bailleul, B., & Wollman, F. A.  
777 (2019). Chlororespiration controls growth under intermittent light. *Plant physiology*,  
778 179(2), 630-639.
- 779 Nawrocki, W. J., Tourasse, N. J., Taly, A., Rappaport, F., & Wollman, F. A. (2015). The  
780 plastid terminal oxidase: its elusive function points to multiple contributions to plastid  
781 physiology. *Annual review of plant biology*, 66, 49-74.
- 782 Nikkanen, L., Santana Sánchez, A., Ermakova, M., Rögner, M., Cournac, L., &  
783 Allahverdiyeva, Y. (2020). Functional redundancy between flavodiiron proteins and  
784 NDH-1 in *Synechocystis* sp. PCC 6803. *The Plant Journal*, 103(4), 1460-1476.
- 785 Picossi, S., Flores, E., & Herrero, A. (2015). The LysR-type transcription factor PacR is a  
786 global regulator of photosynthetic carbon assimilation in *Anabaena*. *Environmental*  
787 *microbiology*, 17(9), 3341-3351.
- 788 Robles-Rengel, R., Florencio, F. J., & Muro-Pastor, M. I. (2019). Redox interference in  
789 nitrogen status via oxidative stress is mediated by 2-oxoglutarate in cyanobacteria. *New*  
790 *Phytologist*, 224(1), 216-228.
- 791 Roumezi, B., Avilan, L., Risoul, V., Brugna, M., Rabouille, S., & Latifi, A. (2020).  
792 Overproduction of the Flv3B flavodiiron, enhances the photobiological hydrogen  
793 production by the nitrogen-fixing cyanobacterium *Nostoc* PCC 7120. *Microbial cell*  
794 *factories*, 19(1), 1-10.
- 795 Santana-Sanchez, A., Solymosi, D., Mustila, H., Bersanini, L., Aro, E. M., &  
796 Allahverdiyeva, Y. (2019). Flavodiiron proteins 1-to-4 function in versatile combinations  
797 in O<sub>2</sub> photoreduction in cyanobacteria. *Elife*, 8, e45766.



- 798 Saroussi, S., Karns, D. A., Thomas, D. C., Bloszies, C., Fiehn, O., Posewitz, M. C., &  
799 Grossman, A. R. (2019). Alternative outlets for sustaining photosynthetic electron  
800 transport during dark-to-light transitions. *Proceedings of the National Academy of*  
801 *Sciences*, 116(23), 11518-11527.
- 802 Shcolnick, S., Summerfield, T. C., Reytman, L., Sherman, L. A., & Keren, N. (2009). The  
803 mechanism of iron homeostasis in the unicellular cyanobacterium *Synechocystis* sp. PCC  
804 6803 and its relationship to oxidative stress. *Plant Physiology*, 150(4), 2045-2056.
- 805 Sherman, D. M., & Sherman, L. A. (1983). Effect of iron deficiency and iron restoration on  
806 ultrastructure of *Anacystis nidulans*. *Journal of bacteriology*, 156(1), 393-401.
- 807 Shi, T., Sun, Y., & Falkowski, P. G. (2007). Effects of iron limitation on the expression of  
808 metabolic genes in the marine cyanobacterium *Trichodesmium erythraeum* IMS101.  
809 *Environmental Microbiology*, 9(12), 2945-2956.
- 810 Singh, A. K., McIntyre, L. M., & Sherman, L. A. (2003). Microarray analysis of the  
811 genome-wide response to iron deficiency and iron reconstitution in the cyanobacterium  
812 *Synechocystis* sp. PCC 6803. *Plant physiology*, 132(4), 1825-1839.
- 813 Stepien, P., & Johnson, G. N. (2018). Plastid terminal oxidase requires translocation to the  
814 grana stacks to act as a sink for electron transport. *Proceedings of the National Academy*  
815 *of Sciences*, 115(38), 9634-9639.
- 816 Storti, M., Puggioni, M. P., Segalla, A., Morosinotto, T., & Alboresi, A. (2020). The  
817 chloroplast NADH dehydrogenase-like complex influences the photosynthetic activity of  
818 the moss *Physcomitrella patens*. *Journal of Experimental Botany*, 71(18), 5538-5548.
- 819 Storti, M., Segalla, A., Mellon, M., Alboresi, A., & Morosinotto, T. (2020). Regulation of  
820 electron transport is essential for photosystem I stability and plant growth. *New*  
821 *Phytologist*, 228(4), 1316-1326.
- 822 Tamagnini, P., Leitão, E., Oliveira, P., Ferreira, D., Pinto, F., Harris, D. J., ... & Lindblad,  
823 P. (2007). Cyanobacterial hydrogenases: diversity, regulation and applications. *FEMS*  
824 *microbiology reviews*, 31(6), 692-720.

- 825 Tsygankov, A. A. (2007). Nitrogen-fixing cyanobacteria: a review. *Applied biochemistry*  
826 *and microbiology*, 43(3), 250-259.
- 827 Vicente, J. B., Gomes, C. M., Wasserfallen, A., & Teixeira, M. (2002). Module fusion in an  
828 A-type flavoprotein from the cyanobacterium *Synechocystis* condenses a multiple-  
829 component pathway in a single polypeptide chain. *Biochemical and biophysical research*  
830 *communications*, 294(1), 82-87.
- 831 Wang, H. L., Postier, B. L., & Burnap, R. L. (2004). Alterations in global patterns of gene  
832 expression in *Synechocystis* sp. PCC 6803 in response to inorganic carbon limitation and  
833 the inactivation of *ndhR*, a LysR family regulator. *Journal of Biological Chemistry*,  
834 279(7), 5739-5751.
- 835 Woodger, F. J., Bryant, D. A., & Price, G. D. (2007). Transcriptional regulation of the CO<sub>2</sub>-  
836 concentrating mechanism in a euryhaline, coastal marine cyanobacterium, *Synechococcus*  
837 sp. strain PCC 7002: role of NdhR/CcmR. *Journal of Bacteriology*, 189(9), 3335-3347.
- 838 Zhang, C. C., Zhou, C. Z., Burnap, R. L., & Peng, L. (2018). Carbon/nitrogen metabolic  
839 balance: lessons from cyanobacteria. *Trends in plant science*, 23(12), 1116-1130.
- 840 Zhang, P., Allahverdiyeva, Y., Eisenhut, M., & Aro, E. M. (2009). Flavodiiron proteins in  
841 oxygenic photosynthetic organisms: photoprotection of photosystem II by Flv2 and Flv4  
842 in *Synechocystis* sp. PCC 6803. *PLoS One*, 4(4), e533



## Parsed Citations

- Allahverdiyeva, Y., Ermakova, M., Eisenhut, M., Zhang, P., Richaud, P., Hagemann, M., ... & Aro, E. M. (2011). Interplay between flavodiiron proteins and photorespiration in *Synechocystis* sp. PCC 6803. *Journal of Biological Chemistry*, 286(27), 24007-24014.  
Google Scholar: [Author Only](#) [Title Only](#) [Author and Title](#)
- Allahverdiyeva, Y., Mustila, H., Ermakova, M., Bersanini, L., Richaud, P., Ajlani, G., ... & Aro, E. M. (2013). Flavodiiron proteins Flv1 and Flv3 enable cyanobacterial growth and photosynthesis under fluctuating light. *Proceedings of the National Academy of Sciences*, 110(10), 4111-4116.  
Google Scholar: [Author Only](#) [Title Only](#) [Author and Title](#)
- Allahverdiyeva, Y., Isojärvi, J., Zhang, P., & Aro, E. M. (2015). Cyanobacterial oxygenic photosynthesis is protected by flavodiiron proteins. *Life*, 5(1), 716-743.  
Google Scholar: [Author Only](#) [Title Only](#) [Author and Title](#)
- Bailey, S., Melis, A., Mackey, K. R., Cardol, P., Finazzi, G., van Dijken, G., ... & Grossman, A. (2008). Alternative photosynthetic electron flow to oxygen in marine *Synechococcus*. *Biochimica et Biophysica Acta (BBA)-Bioenergetics*, 1777(3), 269-276.  
Google Scholar: [Author Only](#) [Title Only](#) [Author and Title](#)
- Bolte, S., Marcon, E., Jaunario, M., Moyet, L., Paternostre, M., Kuntz, M., & Krieger-Liszkay, A. (2020). Dynamics of the localization of the plastid terminal oxidase inside the chloroplast. *Journal of Experimental Botany*, 71(9), 2661-2669.  
Google Scholar: [Author Only](#) [Title Only](#) [Author and Title](#)
- Bothe, H., Schmitz, O., Yates, M. G., & Newton, W. E. (2010). Nitrogen fixation and hydrogen metabolism in cyanobacteria. *Microbiology and molecular biology reviews*, 74(4), 529-551.  
Google Scholar: [Author Only](#) [Title Only](#) [Author and Title](#)
- Braakman, R., Follows, M. J., & Chisholm, S. W. (2017). Metabolic evolution and the self-organization of ecosystems. *Proceedings of the National Academy of Sciences*, 114(15), E3091-E3100.  
Google Scholar: [Author Only](#) [Title Only](#) [Author and Title](#)
- Brown, K. A., Guo, Z., Tokmina-Lukaszewska, M., Scott, L. W., Lubner, C. E., Smolinski, S., ... & King, P. W. (2019). The oxygen reduction reaction catalyzed by *Synechocystis* sp. PCC 6803 flavodiiron proteins. *Sustainable Energy & Fuels*, 3(11), 3191-3200.  
Google Scholar: [Author Only](#) [Title Only](#) [Author and Title](#)
- Cai, Y., & Wolk, C. P. (1997). *Anabaena* sp. strain PCC 7120 responds to nitrogen deprivation with a cascade-like sequence of transcriptional activations. *Journal of Bacteriology*, 179(1), 267-271.  
Google Scholar: [Author Only](#) [Title Only](#) [Author and Title](#)
- Chaux, F., Burlacot, A., Mekhalfi, M., Auroy, P., Blangy, S., Richaud, P., & Peltier, G. (2017). Flavodiiron proteins promote fast and transient O<sub>2</sub> photoreduction in *Chlamydomonas*. *Plant physiology*, 174(3), 1825-1836.  
Google Scholar: [Author Only](#) [Title Only](#) [Author and Title](#)
- Chen, M., Li, J., Zhang, L., Chang, S., Liu, C., Wang, J., & Li, S. (2014). Auto-flotation of heterocyst enables the efficient production of renewable energy in cyanobacteria. *Scientific reports*, 4(1), 1-9.  
Google Scholar: [Author Only](#) [Title Only](#) [Author and Title](#)
- Cumino, A.C., Marcozzi, C., Barreiro, R., & Salerno, G.L. Carbon cycling in *Anabaena* sp. PCC 7120. Sucrose synthesis in the heterocysts and possible role in nitrogen fixation. *Plant Physiology*, 143, 1385-1397.  
Google Scholar: [Author Only](#) [Title Only](#) [Author and Title](#)
- Daley, S. M., Kappell, A. D., Carrick, M. J., & Burnap, R. L. (2012). Regulation of the cyanobacterial CO<sub>2</sub>-concentrating mechanism involves internal sensing of NADP<sup>+</sup> and  $\alpha$ -ketogutarate levels by transcription factor CcmR. *PLoS One*, 7(7), e41286.  
Google Scholar: [Author Only](#) [Title Only](#) [Author and Title](#)
- Eisenhut, M., Georg, J., Klähn, S., Sakurai, I., Mustila, H., Zhang, P., ... & Aro, E. M. (2012). The antisense RNA *As1\_flv4* in the cyanobacterium *Synechocystis* sp. PCC 6803 prevents premature expression of the *flv4-2* operon upon shift in inorganic carbon supply. *Journal of Biological Chemistry*, 287(40), 33153-33162.  
Google Scholar: [Author Only](#) [Title Only](#) [Author and Title](#)
- Elanskaya, I. V., Bulychev, A. A., Lukashov, E. P., & Muronets, E. M. (2021). Deficiency in flavodiiron protein Flv3 promotes cyclic electron flow and state transition under high light in the cyanobacterium *Synechocystis* sp. PCC 6803. *Biochimica et Biophysica Acta (BBA)-Bioenergetics*, 1862(1), 148318.  
Google Scholar: [Author Only](#) [Title Only](#) [Author and Title](#)
- Ermakova, M., Battchikova, N., Richaud, P., Leino, H., Kosourov, S., Isojärvi, J., ... & Aro, E. M. (2014). Heterocyst-specific flavodiiron protein Flv3B enables oxic diazotrophic growth of the filamentous cyanobacterium *Anabaena* sp. PCC 7120. *Proceedings of the National Academy of Sciences*, 111(30), 11205-11210.  
Google Scholar: [Author Only](#) [Title Only](#) [Author and Title](#)
- Ermakova, M., Battchikova, N., Allahverdiyeva, Y., & Aro, E. M. (2013). Novel heterocyst-specific flavodiiron proteins in *Anabaena* sp. PCC 7120. *FEBS letters*, 587(1), 82-87.

Google Scholar: [Author Only](#) [Title Only](#) [Author and Title](#)

Flaherty, B. L., Van Nieuwerburgh, F., Head, S. R., & Golden, J. W. (2011). Directional RNA deep sequencing sheds new light on the transcriptional response of *Anabaena* sp. strain PCC 7120 to combined-nitrogen deprivation. *BMC genomics*, 12(1), 1-10.

Google Scholar: [Author Only](#) [Title Only](#) [Author and Title](#)

Forchhammer, K., & Selim, K. A. (2020). Carbon/nitrogen homeostasis control in cyanobacteria. *FEMS microbiology reviews*, 44(1), 33-53.

Google Scholar: [Author Only](#) [Title Only](#) [Author and Title](#)

Gerotto, C., Alboresi, A., Meneghesso, A., Jokel, M., Suorsa, M., Aro, E. M., & Morosinotto, T. (2016). Flavodiiron proteins act as safety valve for electrons in *Physcomitrella patens*. *Proceedings of the National Academy of Sciences*, 113(43), 12322-12327.

Google Scholar: [Author Only](#) [Title Only](#) [Author and Title](#)

González, A., Bes, M. T., Valladares, A., Peleato, M. L., & Fillat, M. F. (2012). FurA is the master regulator of iron homeostasis and modulates the expression of tetrapyrrole biosynthesis genes in *Anabaena* sp. PCC 7120. *Environmental microbiology*, 14(12), 3175-3187.

Google Scholar: [Author Only](#) [Title Only](#) [Author and Title](#)

González, A., Angarica, V. E., Sancho, J., & Fillat, M. F. (2014). The FurA regulon in *Anabaena* sp. PCC 7120: in silico prediction and experimental validation of novel target genes. *Nucleic Acids Research*, 42(8), 4833-4846.

Google Scholar: [Author Only](#) [Title Only](#) [Author and Title](#)

Guío, J., Sarasa-Buisan, C., Velázquez-Campoy, A., Bes, M. T., Fillat, M. F., Peleato, M. L., & Sevilla, E. (2020). 2-oxoglutarate modulates the affinity of FurA for the *ntcA* promoter in *Anabaena* sp. PCC 7120. *FEBS letters*, 594(2), 278-289.

Google Scholar: [Author Only](#) [Title Only](#) [Author and Title](#)

Hackenberg, C., Engelhardt, A., Matthijs, H. C., Wittink, F., Bauwe, H., Kaplan, A., & Hagemann, M. (2009). Photorespiratory 2-phosphoglycolate metabolism and photoreduction of O<sub>2</sub> cooperate in high-light acclimation of *Synechocystis* sp. strain PCC 6803. *Planta*, 230(4), 625-637.

Google Scholar: [Author Only](#) [Title Only](#) [Author and Title](#)

Helman, Y., Tchernov, D., Reinhold, L., Shibata, M., Ogawa, T., Schwarz, R., ... & Kaplan, A. (2003). Genes encoding A-type flavoproteins are essential for photoreduction of O<sub>2</sub> in cyanobacteria. *Current Biology*, 13(3), 230-235.

Google Scholar: [Author Only](#) [Title Only](#) [Author and Title](#)

Hoffman, B. M., Lukoyanov, D., Yang, Z. Y., Dean, D. R., & Seefeldt, L. C. (2014). Mechanism of nitrogen fixation by nitrogenase: the next stage. *Chemical reviews*, 114(8), 4041-4062.

Google Scholar: [Author Only](#) [Title Only](#) [Author and Title](#)

Howe, C., Becker, D., Steinweg, C., Posten, C., & Stensjö, K. (2020). Iron limitation—A perspective on a growth-restricted cultivation strategy for a H<sub>2</sub> production system using the diazotrophic cyanobacterium *Nostoc* PCC 7120  $\Delta$ hupW. *Bioresource Technology Reports*, 11, 100508.

Google Scholar: [Author Only](#) [Title Only](#) [Author and Title](#)

Huokko, Tuomas, et al. "Role of type 2 NAD (P) H dehydrogenase NdbC in redox regulation of carbon allocation in *Synechocystis*." *Plant physiology* 174.3 (2017): 1863-1880.

Google Scholar: [Author Only](#) [Title Only](#) [Author and Title](#)

Jiang, Y. L., Wang, X. P., Sun, H., Han, S. J., Li, W. F., Cui, N., ... & Zhou, C. Z. (2018). Coordinating carbon and nitrogen metabolic signaling through the cyanobacterial global repressor NdhR. *Proceedings of the National Academy of Sciences*, 115(2), 403-408.

Google Scholar: [Author Only](#) [Title Only](#) [Author and Title](#)

Jokel, M., Johnson, X., Peltier, G., Aro, E. M., & Allahverdiyeva, Y. (2018). Hunting the main player enabling *Chlamydomonas reinhardtii* growth under fluctuating light. *The Plant Journal*, 94(5), 822-835.

Google Scholar: [Author Only](#) [Title Only](#) [Author and Title](#)

Khetkorn, W., Baebprasert, W., Lindblad, P., & Incharoensakdi, A. (2012). Redirecting the electron flow towards the nitrogenase and bidirectional Hox-hydrogenase by using specific inhibitors results in enhanced H<sub>2</sub> production in the cyanobacterium *Anabaena siamensis* TISTR 8012. *Bioresource technology*, 118, 265-271.

Google Scholar: [Author Only](#) [Title Only](#) [Author and Title](#)

Klähn, S., Orf, I., Schwarz, D., Matthiessen, J. K., Kopka, J., Hess, W. R., & Hagemann, M. (2015). Integrated transcriptomic and metabolomic characterization of the low-carbon response using an *ndhR* mutant of *Synechocystis* sp. PCC 6803. *Plant Physiology*, 169(3), 1540-1556.

Google Scholar: [Author Only](#) [Title Only](#) [Author and Title](#)

Kotai, J. (1972). Instructions for preparation of modified nutrient solution Z8 for algae. Norwegian Institute for Water Research, Oslo, 11(69), 5..

Google Scholar: [Author Only](#) [Title Only](#) [Author and Title](#)

Latifi, A., Jeanjean, R., Lemeille, S., Havaux, M., & Zhang, C. C. (2005). Iron starvation leads to oxidative stress in *Anabaena* sp. strain PCC 7120. *Journal of Bacteriology*, 187(18), 6596-6598.

Google Scholar: [Author Only](#) [Title Only](#) [Author and Title](#)

Leino, H., Shunmugam, S., Isojärvi, J., Oliveira, P., Mulo, P., Saari, L., ... & Allahverdiyeva, Y. (2014). Characterization of ten H<sub>2</sub> producing cyanobacteria isolated from the Baltic Sea and Finnish lakes. *International Journal of Hydrogen Energy*, 39(17), 8983-8991.

Google Scholar: [Author Only](#) [Title Only](#) [Author and Title](#)

Liran, O., Shemesh, E., & Tchernov, D. (2018). Investigation into the CO<sub>2</sub> concentrating step rates within the carbon concentrating mechanism of *Synechocystis* sp. PCC6803 at various pH and light intensities reveal novel mechanistic properties. *Algal research*, 33, 419-429.

Google Scholar: [Author Only](#) [Title Only](#) [Author and Title](#)

Masukawa, H., Mochimaru, M., & Sakurai, H. (2002). Disruption of the uptake hydrogenase gene, but not of the bidirectional hydrogenase gene, leads to enhanced photobiological hydrogen production by the nitrogen-fixing cyanobacterium *Anabaena* sp. PCC 7120. *Applied Microbiology and Biotechnology*, 58(5), 618-624.

Google Scholar: [Author Only](#) [Title Only](#) [Author and Title](#)

McDonald, A. E., Amirsadeghi, S., & Vanlerberghe, G. C. (2003). Prokaryotic orthologues of mitochondrial alternative oxidase and plastid terminal oxidase. *Plant molecular biology*, 53(6), 865-876.

Google Scholar: [Author Only](#) [Title Only](#) [Author and Title](#)

Meeks, J. C., & Castenholz, R. W. (1971). Growth and photosynthesis in an extreme thermophile, *Synechococcus lividus* (Cyanophyta). *Archiv für Mikrobiologie*, 78(1), 25-41.

Google Scholar: [Author Only](#) [Title Only](#) [Author and Title](#)

Mi, H., Endo, T., Ogawa, T., & Asada, K. (1995). Thylakoid membrane-bound, NADPH-specific pyridine nucleotide dehydrogenase complex mediates cyclic electron transport in the cyanobacterium *Synechocystis* sp. PCC 6803. *Plant and Cell Physiology*, 36(4), 661-668.

Google Scholar: [Author Only](#) [Title Only](#) [Author and Title](#)

Mitschke, J., Vioque, A., Haas, F., Hess, W. R., & Muro-Pastor, A. M. (2011). Dynamics of transcriptional start site selection during nitrogen stress-induced cell differentiation in *Anabaena* sp. PCC7120. *Proceedings of the National Academy of Sciences*, 108(50), 20130-20135.

Google Scholar: [Author Only](#) [Title Only](#) [Author and Title](#)

Mustila, H., Paananen, P., Battchikova, N., Santana-Sánchez, A., Muth-Pawlak, D., Hagemann, M., ... & Allahverdiyeva, Y. (2016). The flavodiiron protein Flv3 functions as a homo-oligomer during stress acclimation and is distinct from the Flv1/Flv3 hetero-oligomer specific to the O<sub>2</sub> photoreduction pathway. *Plant and Cell Physiology*, 57(7), 1468-1483.

Google Scholar: [Author Only](#) [Title Only](#) [Author and Title](#)

Nawrocki, W. J., Buchert, F., Joliot, P., Rappaport, F., Bailleul, B., & Wollman, F. A. (2019). Chlororespiration controls growth under intermittent light. *Plant physiology*, 179(2), 630-639.

Google Scholar: [Author Only](#) [Title Only](#) [Author and Title](#)

Nawrocki, W. J., Tourasse, N. J., Taly, A., Rappaport, F., & Wollman, F. A. (2015). The plastid terminal oxidase: its elusive function points to multiple contributions to plastid physiology. *Annual review of plant biology*, 66, 49-74.

Google Scholar: [Author Only](#) [Title Only](#) [Author and Title](#)

Nikkanen, L., Santana Sánchez, A., Ermakova, M., Rögner, M., Cournac, L., & Allahverdiyeva, Y. (2020). Functional redundancy between flavodiiron proteins and NDH-1 in *Synechocystis* sp. PCC 6803. *The Plant Journal*, 103(4), 1460-1476.

Google Scholar: [Author Only](#) [Title Only](#) [Author and Title](#)

Picossi, S., Flores, E., & Herrero, A. (2015). The LysR-type transcription factor PacR is a global regulator of photosynthetic carbon assimilation in *Anabaena*. *Environmental microbiology*, 17(9), 3341-3351.

Google Scholar: [Author Only](#) [Title Only](#) [Author and Title](#)

Robles-Rengel, R., Florencio, F. J., & Muro-Pastor, M. I. (2019). Redox interference in nitrogen status via oxidative stress is mediated by 2-oxoglutarate in cyanobacteria. *New Phytologist*, 224(1), 216-228.

Google Scholar: [Author Only](#) [Title Only](#) [Author and Title](#)

Roumezi, B., Avilan, L., Risoul, V., Brugna, M., Rabouille, S., & Latifi, A. (2020). Overproduction of the Flv3B flavodiiron, enhances the photobiological hydrogen production by the nitrogen-fixing cyanobacterium *Nostoc* PCC 7120. *Microbial cell factories*, 19(1), 1-10.

Google Scholar: [Author Only](#) [Title Only](#) [Author and Title](#)

Santana-Sanchez, A., Solymosi, D., Mustila, H., Bersanini, L., Aro, E. M., & Allahverdiyeva, Y. (2019). Flavodiiron proteins 1–to-4 function in versatile combinations in O<sub>2</sub> photoreduction in cyanobacteria. *Elife*, 8, e45766.

Google Scholar: [Author Only](#) [Title Only](#) [Author and Title](#)

Saroussi, S., Karns, D. A., Thomas, D. C., Bloszies, C., Fiehn, O., Posewitz, M. C., & Grossman, A. R. (2019). Alternative outlets for sustaining photosynthetic electron transport during dark-to-light transitions. *Proceedings of the National Academy of Sciences*, 116(23), 11518-11527.

Google Scholar: [Author Only](#) [Title Only](#) [Author and Title](#)

Shcolnick, S., Summerfield, T. C., Reytman, L., Sherman, L. A., & Keren, N. (2009). The mechanism of iron homeostasis in the unicellular

**cyanobacterium *Synechocystis* sp. PCC 6803 and its relationship to oxidative stress. *Plant Physiology*, 150(4), 2045-2056.**

Google Scholar: [Author Only](#) [Title Only](#) [Author and Title](#)

**Sherman, D. M., & Sherman, L. A. (1983). Effect of iron deficiency and iron restoration on ultrastructure of *Anacystis nidulans*. *Journal of bacteriology*, 156(1), 393-401.**

Google Scholar: [Author Only](#) [Title Only](#) [Author and Title](#)

**Shi, T., Sun, Y., & Falkowski, P. G. (2007). Effects of iron limitation on the expression of metabolic genes in the marine cyanobacterium *Trichodesmium erythraeum* IMS101. *Environmental Microbiology*, 9(12), 2945-2956.**

Google Scholar: [Author Only](#) [Title Only](#) [Author and Title](#)

**Singh, A. K., McIntyre, L. M., & Sherman, L. A. (2003). Microarray analysis of the genome-wide response to iron deficiency and iron reconstitution in the cyanobacterium *Synechocystis* sp. PCC 6803. *Plant physiology*, 132(4), 1825-1839.**

Google Scholar: [Author Only](#) [Title Only](#) [Author and Title](#)

**Stepien, P., & Johnson, G. N. (2018). Plastid terminal oxidase requires translocation to the grana stacks to act as a sink for electron transport. *Proceedings of the National Academy of Sciences*, 115(38), 9634-9639.**

Google Scholar: [Author Only](#) [Title Only](#) [Author and Title](#)

**Storti, M., Puggioni, M. P., Segalla, A., Morosinotto, T., & Alboresi, A. (2020). The chloroplast NADH dehydrogenase-like complex influences the photosynthetic activity of the moss *Physcomitrella patens*. *Journal of Experimental Botany*, 71(18), 5538-5548.**

Google Scholar: [Author Only](#) [Title Only](#) [Author and Title](#)

**Storti, M., Segalla, A., Mellon, M., Alboresi, A., & Morosinotto, T. (2020). Regulation of electron transport is essential for photosystem I stability and plant growth. *New Phytologist*, 228(4), 1316-1326.**

Google Scholar: [Author Only](#) [Title Only](#) [Author and Title](#)

**Tamagnini, P., Leitão, E., Oliveira, P., Ferreira, D., Pinto, F., Harris, D. J., ... & Lindblad, P. (2007). Cyanobacterial hydrogenases: diversity, regulation and applications. *FEMS microbiology reviews*, 31(6), 692-720.**

Google Scholar: [Author Only](#) [Title Only](#) [Author and Title](#)

**Tsygankov, A. A. (2007). Nitrogen-fixing cyanobacteria: a review. *Applied biochemistry and microbiology*, 43(3), 250-259.**

Google Scholar: [Author Only](#) [Title Only](#) [Author and Title](#)

**Vicente, J. B., Gomes, C. M., Wasserfallen, A., & Teixeira, M. (2002). Module fusion in an A-type flavoprotein from the cyanobacterium *Synechocystis* condenses a multiple-component pathway in a single polypeptide chain. *Biochemical and biophysical research communications*, 294(1), 82-87.**

Google Scholar: [Author Only](#) [Title Only](#) [Author and Title](#)

**Wang, H. L., Postier, B. L., & Burnap, R. L. (2004). Alterations in global patterns of gene expression in *Synechocystis* sp. PCC 6803 in response to inorganic carbon limitation and the inactivation of *ndhR*, a LysR family regulator. *Journal of Biological Chemistry*, 279(7), 5739-5751.**

Google Scholar: [Author Only](#) [Title Only](#) [Author and Title](#)

**Woodger, F. J., Bryant, D. A., & Price, G. D. (2007). Transcriptional regulation of the CO<sub>2</sub>-concentrating mechanism in a euryhaline, coastal marine cyanobacterium, *Synechococcus* sp. strain PCC 7002: role of *NdhR/CcmR*. *Journal of Bacteriology*, 189(9), 3335-3347.**

Google Scholar: [Author Only](#) [Title Only](#) [Author and Title](#)

**Zhang, C. C., Zhou, C. Z., Burnap, R. L., & Peng, L. (2018). Carbon/nitrogen metabolic balance: lessons from cyanobacteria. *Trends in plant science*, 23(12), 1116-1130.**

Google Scholar: [Author Only](#) [Title Only](#) [Author and Title](#)

**Zhang, P., Allahverdiyeva, Y., Eisenhut, M., & Aro, E. M. (2009). Flavodiiron proteins in oxygenic photosynthetic organisms: photoprotection of photosystem II by Flv2 and Flv4 in *Synechocystis* sp. PCC 6803. *PLoS One*, 4(4), e533**

Google Scholar: [Author Only](#) [Title Only](#) [Author and Title](#)
